# Supplementary material
Source: PubMed Central journal article supplement (PMC6352909)
Supplement: NIHMS1515504-supplement-1.pdf [file NIHMS1515504-supplement-1.pdf]

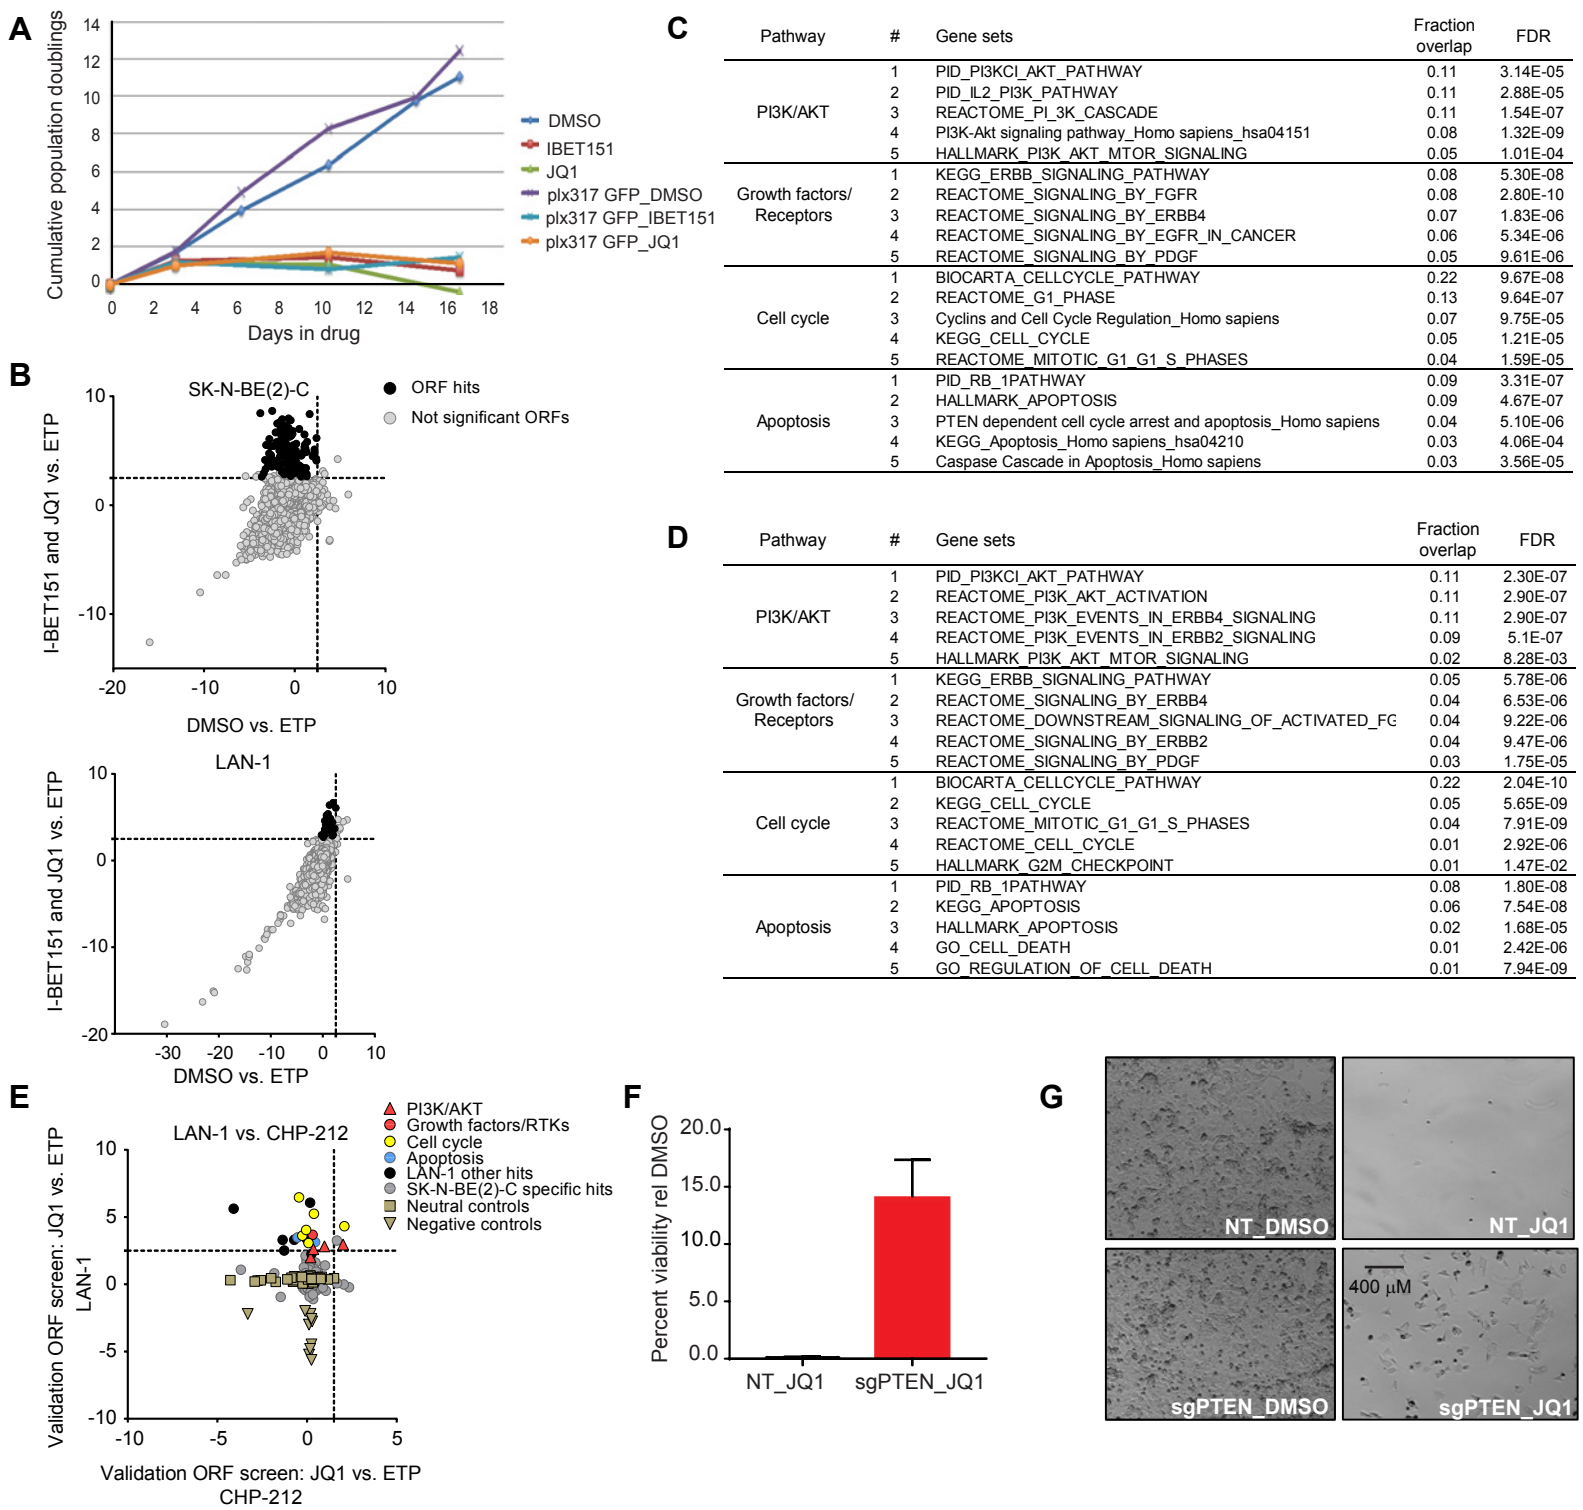

**Figure S1, Related to Figure 1: Characterization and validation of genome-scale ORF and CRISPR BET inhibitor rescue screens.** **A.** Cumulative population doublings of SK-N-BE(2)-C cells treated with DMSO or the concentrations of IBET151 or JQ1 used in the ORF and CRISPR rescue screens shown in Figure 1. Both parental cells and cells infected with plx317-GFP to control for lentiviral infection effects were assayed. **B.** Scatter plots presenting the z-score for average  $\log_2(\text{FC})$  ORF representation for I-BET151 and JQ1 vs. ETP (y-axis) and for DMSO vs. ETP in SK-N-BE(2)-C (up) and LAN-1 (down) cells. Dotted gray lines at z-score = 2.5 on either axis demonstrate that the ORF hits are not scoring in the DMSO arm as promoting growth over time. Gene set enrichment analysis of ORF hits in SK-N-BE(2)-C (**C**) and LAN-1 (**D**) cells. The fraction overlap represents the fraction of ORF hits among the genes in each gene signature. **E.** Medium-throughput ORF validation screen with 150 ORFs corresponding to top hits from the genome-scale screen as well as negative and neutral control ORFs. ORF representation for JQ1 vs. ETP is shown for CHP-212 on the x-axis, and for LAN-1 cells on the y-axis. **F.** Long-term viability in SK-N-BE(2)-C cells lentivirally infected with either a non-targeting (NT) control sgRNA or an sgRNA directed against PTEN and treated with vehicle or 1  $\mu\text{M}$  JQ1. The experiment was conducted in biological duplicate. Data are shown as the percent of viable cells relative to the DMSO arm for each condition. Mean values of duplicate measurements are shown. **G.** Representative images of data presented in (F) demonstrating the ability of PTEN suppression to rescue the anti-viability effects of JQ1.

Table S1, Related to Figure 1. List of hits for the genome-wide ORF resistance screen in the SK-N-BE(2)-C cell line.

| #  | Construct ID   | Gene [# ORF hits per gene/total # ORFs per gene] | Pathway             | Hit specificity           | z-score I-BET151 vs. ETP | z-score JQ1 vs. ETP | Av. z-scores I-BET151 and JQ1 vs. ETP | z-score DMSO vs. ETP | Validation screen |
|----|----------------|--------------------------------------------------|---------------------|---------------------------|--------------------------|---------------------|---------------------------------------|----------------------|-------------------|
| 1  | TRCN0000488343 | KRAS [1/4]                                       |                     | SK-N-BE(2)-C specific hit | 7.80                     | 9.52                | 8.66                                  | -2.48                | 1                 |
| 2  | TRCN0000488923 | AKT1 [2/4]                                       | PI3K/AKT            | Core hit                  | 8.85                     | 8.04                | 8.45                                  | -3.79                | 1                 |
| 3  | TRCN0000469233 | TOX [1/1]                                        |                     | SK-N-BE(2)-C specific hit | 9.66                     | 7.06                | 8.36                                  | 1.64                 | 1                 |
| 4  | TRCN0000492315 | MTNR1A [2/2]                                     |                     | SK-N-BE(2)-C specific hit | 8.59                     | 7.35                | 7.97                                  | -0.68                | 1                 |
| 5  | TRCN0000489962 | AKT1 [2/4]                                       | PI3K/AKT            | Core hit                  | 7.74                     | 8.05                | 7.90                                  | -1.37                | 1                 |
| 6  | TRCN0000488582 | MTNR1A [2/2]                                     |                     | SK-N-BE(2)-C specific hit | 8.23                     | 7.36                | 7.80                                  | -0.45                | 1                 |
| 7  | TRCN0000467249 | S1PR1 [2/2]                                      |                     | SK-N-BE(2)-C specific hit | 8.09                     | 7.44                | 7.77                                  | -1.47                | 1                 |
| 8  | TRCN0000492091 | CNR2 [2/2]                                       |                     | SK-N-BE(2)-C specific hit | 7.25                     | 7.83                | 7.54                                  | -1.74                | 1                 |
| 9  | TRCN0000489111 | HTR1E [2/2]                                      |                     | SK-N-BE(2)-C specific hit | 7.78                     | 7.22                | 7.50                                  | -1.93                | 1                 |
| 10 | TRCN0000487761 | S1PR5 [5/5]                                      |                     | SK-N-BE(2)-C specific hit | 7.90                     | 6.67                | 7.29                                  | -0.89                | 1                 |
| 11 | TRCN0000489463 | GPR82 [2/2]                                      | Growth factors/RTKs | SK-N-BE(2)-C specific hit | 6.74                     | 7.67                | 7.21                                  | -1.04                | 1                 |
| 12 | TRCN0000475926 | HTR1E [2/2]                                      |                     | SK-N-BE(2)-C specific hit | 6.70                     | 7.48                | 7.09                                  | -0.72                | 1                 |
| 13 | TRCN0000487935 | S1PR5 [5/5]                                      |                     | SK-N-BE(2)-C specific hit | 7.35                     | 6.77                | 7.06                                  | -0.65                | 1                 |
| 14 | TRCN0000489868 | AKT2 [2/5]                                       | PI3K/AKT            | Core hit                  | 6.59                     | 7.41                | 7.00                                  | 0.50                 | 1                 |
| 15 | TRCN0000488505 | P2RY14 [2/2]                                     |                     | SK-N-BE(2)-C specific hit | 6.61                     | 7.32                | 6.97                                  | -1.56                | 1                 |
| 16 | TRCN0000488729 | CNR2 [2/2]                                       |                     | SK-N-BE(2)-C specific hit | 6.83                     | 7.06                | 6.95                                  | -0.97                | 1                 |
| 17 | TRCN0000487993 | P2RY14 [2/2]                                     |                     | SK-N-BE(2)-C specific hit | 6.24                     | 7.40                | 6.82                                  | -0.96                | 1                 |
| 18 | TRCN0000489826 | GPR34 [3/3]                                      | Growth factors/RTKs | SK-N-BE(2)-C specific hit | 6.75                     | 6.88                | 6.82                                  | -0.25                | 1                 |
| 19 | TRCN0000487973 | S1PR5 [5/5]                                      |                     | SK-N-BE(2)-C specific hit | 7.20                     | 6.42                | 6.81                                  | -0.66                | 1                 |
| 20 | TRCN0000488625 | ADORA1 [1/3]                                     |                     | SK-N-BE(2)-C specific hit | 6.49                     | 7.11                | 6.80                                  | -1.08                | 1                 |
| 21 | TRCN0000488236 | S1PR5 [5/5]                                      |                     | SK-N-BE(2)-C specific hit | 7.09                     | 6.36                | 6.73                                  | -1.40                | 1                 |
| 22 | TRCN0000489149 | S1PR4 [3/3]                                      |                     | SK-N-BE(2)-C specific hit | 6.40                     | 6.97                | 6.69                                  | -0.69                | 1                 |
| 23 | TRCN0000487798 | S1PR1 [2/2]                                      |                     | SK-N-BE(2)-C specific hit | 6.52                     | 6.84                | 6.68                                  | -2.10                | 1                 |
| 24 | TRCN0000487714 | PIK3CA [8/11]                                    | PI3K/AKT            | Core hit                  | 5.69                     | 7.40                | 6.55                                  | -0.25                | 1                 |
| 25 | TRCN0000470181 | CCND3 [1/1]                                      | Cell cycle          | Core hit                  | 6.56                     | 6.42                | 6.49                                  | 1.07                 | 1                 |
| 26 | TRCN0000488708 | GPR22 [2/2]                                      | Growth factors/RTKs | SK-N-BE(2)-C specific hit | 5.81                     | 6.95                | 6.38                                  | -0.97                | 1                 |
| 27 | TRCN0000489040 | PIK3CA [8/11]                                    | PI3K/AKT            | Core hit                  | 6.32                     | 6.43                | 6.38                                  | -0.39                | 1                 |
| 28 | TRCN0000469954 | GPR22 [2/2]                                      | Growth factors/RTKs | SK-N-BE(2)-C specific hit | 6.40                     | 6.25                | 6.33                                  | -1.28                | 1                 |
| 29 | TRCN0000466710 | S1PR5 [5/5]                                      |                     | SK-N-BE(2)-C specific hit | 6.78                     | 5.85                | 6.32                                  | -1.46                | 1                 |
| 30 | TRCN0000488655 | S1PR4 [3/3]                                      |                     | SK-N-BE(2)-C specific hit | 6.35                     | 6.22                | 6.29                                  | -0.57                | 1                 |
| 31 | TRCN0000488331 | CDK6 [3/3]                                       | Cell cycle          | Core hit                  | 6.92                     | 5.42                | 6.17                                  | 2.40                 | 1                 |
| 32 | TRCN0000488076 | HCAR2 [2/2]                                      |                     | SK-N-BE(2)-C specific hit | 5.70                     | 6.64                | 6.17                                  | -1.40                | 1                 |
| 33 | TRCN0000472965 | GPR34 [3/3]                                      | Growth factors/RTKs | SK-N-BE(2)-C specific hit | 5.91                     | 6.27                | 6.09                                  | -1.26                | 1                 |
| 34 | TRCN0000489344 | HCAR2 [2/2]                                      |                     | SK-N-BE(2)-C specific hit | 5.80                     | 6.34                | 6.07                                  | -2.80                | 1                 |
| 35 | TRCN0000489648 | PIK3CA [8/11]                                    | PI3K/AKT            | Core hit                  | 5.24                     | 6.45                | 5.85                                  | -1.73                | 1                 |
| 36 | TRCN0000474343 | CCNE2 [1/2]                                      | Cell cycle          | Core hit                  | 5.81                     | 5.84                | 5.83                                  | 1.36                 | 1                 |
| 37 | TRCN0000487730 | PIK3CA [8/11]                                    | PI3K/AKT            | Core hit                  | 5.27                     | 6.29                | 5.78                                  | -2.03                | 1                 |
| 38 | TRCN0000489611 | HTR1F [2/2]                                      |                     | SK-N-BE(2)-C specific hit | 5.94                     | 5.61                | 5.78                                  | -1.93                | 1                 |
| 39 | TRCN0000488074 | GPR20 [3/3]                                      | Growth factors/RTKs | SK-N-BE(2)-C specific hit | 5.93                     | 5.55                | 5.74                                  | -1.84                | 1                 |
| 40 | TRCN0000489708 | HCAR1 [2/2]                                      |                     | SK-N-BE(2)-C specific hit | 5.48                     | 5.98                | 5.73                                  | -0.99                | 1                 |
| 41 | TRCN0000489472 | SUCNR1 [1/2]                                     |                     | SK-N-BE(2)-C specific hit | 5.31                     | 5.98                | 5.65                                  | 0.16                 | 1                 |
| 42 | TRCN0000488224 | HTR1B [3/3]                                      |                     | SK-N-BE(2)-C specific hit | 5.54                     | 5.68                | 5.61                                  | -2.93                | 1                 |
| 43 | TRCN0000491310 | GPR20 [3/3]                                      | Growth factors/RTKs | SK-N-BE(2)-C specific hit | 5.64                     | 5.50                | 5.57                                  | -1.48                | 1                 |
| 44 | TRCN0000489793 | HTR1F [2/2]                                      |                     | SK-N-BE(2)-C specific hit | 5.33                     | 5.81                | 5.57                                  | -0.99                | 1                 |
| 45 | TRCN0000492042 | GPR34 [3/3]                                      | Growth factors/RTKs | SK-N-BE(2)-C specific hit | 5.84                     | 5.28                | 5.56                                  | 1.13                 | 1                 |
| 46 | TRCN0000489451 | HTR1B [3/3]                                      |                     | SK-N-BE(2)-C specific hit | 5.38                     | 5.71                | 5.55                                  | -2.01                | 1                 |
| 47 | TRCN0000466228 | HTR1D [3/3]                                      |                     | SK-N-BE(2)-C specific hit | 5.40                     | 5.66                | 5.53                                  | -3.15                | 1                 |
| 48 | TRCN0000488528 | CXCR1 [3/3]                                      |                     | SK-N-BE(2)-C specific hit | 5.43                     | 5.59                | 5.51                                  | -0.16                | 1                 |
| 49 | TRCN0000487810 | HTR1D [3/3]                                      |                     | SK-N-BE(2)-C specific hit | 5.03                     | 5.85                | 5.44                                  | -2.31                | 1                 |
| 50 | TRCN0000492093 | PIK3CA [8/11]                                    | PI3K/AKT            | Core hit                  | 4.80                     | 5.98                | 5.39                                  | -0.58                | 1                 |
| 51 | TRCN0000489036 | HTR1D [3/3]                                      |                     | SK-N-BE(2)-C specific hit | 5.14                     | 5.63                | 5.39                                  | -2.68                | 1                 |
| 52 | TRCN0000471924 | HTR1B [3/3]                                      |                     | SK-N-BE(2)-C specific hit | 5.25                     | 5.48                | 5.37                                  | -1.45                | 1                 |
| 53 | TRCN0000491318 | PIK3CA [8/11]                                    | PI3K/AKT            | Core hit                  | 4.90                     | 5.78                | 5.34                                  | 1.08                 | 1                 |
| 54 | TRCN0000465402 | FGFR2 [1/7]                                      | Growth factors/RTKs | SK-N-BE(2)-C specific hit | 4.54                     | 6.12                | 5.33                                  | -1.17                | 1                 |
| 55 | TRCN0000468617 | NFIB [1/1]                                       |                     | SK-N-BE(2)-C specific hit | 5.17                     | 4.75                | 5.21                                  | 1.17                 | 1                 |
| 56 | TRCN0000488434 | DRD3 [1/3]                                       |                     | SK-N-BE(2)-C specific hit | 5.20                     | 5.12                | 5.16                                  | -0.09                | 1                 |
| 57 | TRCN0000489478 | NTRK3 [2/6]                                      |                     | SK-N-BE(2)-C specific hit | 4.88                     | 5.40                | 5.14                                  | 0.00                 | 1                 |
| 58 | TRCN0000481165 | CDK6 [3/3]                                       | Cell cycle          | Core hit                  | 5.60                     | 4.64                | 5.12                                  | 2.19                 | 1                 |
| 59 | TRCN0000492137 | GRM8 [5/5]                                       |                     | SK-N-BE(2)-C specific hit | 4.77                     | 5.44                | 5.11                                  | -0.66                | 1                 |
| 60 | TRCN0000473906 | S1PR4 [3/3]                                      |                     | SK-N-BE(2)-C specific hit | 4.83                     | 5.21                | 5.02                                  | -1.54                | 1                 |
| 61 | TRCN0000491586 | STK40 [4/5]                                      |                     | SK-N-BE(2)-C specific hit | 5.62                     | 4.42                | 5.02                                  | -1.69                | 1                 |
| 62 | TRCN0000472445 | NFIC [1/1]                                       |                     | SK-N-BE(2)-C specific hit | 4.72                     | 5.23                | 4.98                                  | -0.56                | 1                 |
| 63 | TRCN0000489632 | RASGRP1 [1/1]                                    |                     | SK-N-BE(2)-C specific hit | 4.73                     | 5.20                | 4.97                                  | 0.09                 | 1                 |
| 64 | TRCN0000491475 | PDGFRA [2/4]                                     | Growth factors/RTKs | SK-N-BE(2)-C specific hit | 4.45                     | 5.33                | 4.89                                  | 1.30                 | 1                 |
| 65 | TRCN0000467546 | CDK6 [3/3]                                       | Cell cycle          | Core hit                  | 5.16                     | 4.41                | 4.79                                  | 2.16                 | 1                 |
| 66 | TRCN0000487905 | GPR183 [2/2]                                     | Growth factors/RTKs | SK-N-BE(2)-C specific hit | 4.69                     | 4.86                | 4.78                                  | -1.18                | 1                 |
| 67 | TRCN0000489482 | HCAR3 [2/3]                                      |                     | SK-N-BE(2)-C specific hit | 4.54                     | 5.00                | 4.77                                  | -0.79                | 1                 |
| 68 | TRCN0000488432 | MTNR1B [1/1]                                     |                     | SK-N-BE(2)-C specific hit | 4.56                     | 4.96                | 4.76                                  | 0.67                 | 1                 |
| 69 | TRCN0000489225 | GRM8 [5/5]                                       |                     | SK-N-BE(2)-C specific hit | 4.92                     | 4.57                | 4.75                                  | -2.82                | 1                 |
| 70 | TRCN0000488502 | ADORA3 [2/3]                                     |                     | SK-N-BE(2)-C specific hit | 5.27                     | 4.17                | 4.72                                  | -0.88                | 1                 |
| 71 | TRCN0000466042 | P2RY13 [1/4]                                     |                     | SK-N-BE(2)-C specific hit | 4.30                     | 5.14                | 4.72                                  | -0.83                | 1                 |
| 72 | TRCN0000489920 | BCL2L1 [2/2]                                     | Apoptosis           | Core hit                  | 3.74                     | 5.66                | 4.70                                  | 0.84                 | 1                 |
| 73 | TRCN0000489020 | CXCR1 [3/3]                                      |                     | SK-N-BE(2)-C specific hit | 4.39                     | 4.89                | 4.64                                  | -0.77                | 1                 |
| 74 | TRCN0000487954 | GRM8 [5/5]                                       |                     | SK-N-BE(2)-C specific hit | 4.13                     | 5.07                | 4.60                                  | -2.62                | 1                 |
| 75 | TRCN0000489394 | PIK3CA [8/11]                                    | PI3K/AKT            | Core hit                  | 4.13                     | 5.04                | 4.59                                  | 0.26                 | 1                 |
| 76 | TRCN0000488896 | LTB4R [1/3]                                      |                     | SK-N-BE(2)-C specific hit | 5.29                     | 3.88                | 4.59                                  | -1.14                | 1                 |
| 77 | TRCN0000472603 | BCL2L1 [2/2]                                     | Apoptosis           | Core hit                  | 4.00                     | 5.10                | 4.55                                  | 0.72                 | 1                 |
| 78 | TRCN0000467216 | CCND1 [1/1]                                      | Cell cycle          | Core hit                  | 4.64                     | 4.33                | 4.49                                  | 1.98                 | 1                 |
| 79 | TRCN0000488235 | GPR82 [2/2]                                      | Growth factors/RTKs | SK-N-BE(2)-C specific hit | 4.05                     | 4.91                | 4.48                                  | -0.75                | 1                 |

| #   | Construct ID   | Gene [# ORF hits per gene/total # ORFs per gene] | Pathway             | Hit specificity           | z-score I-BET151 vs. ETP | z-score JQ1 vs. ETP | Av. z-scores I-BET151 and JQ1 vs. ETP | z-score DMSO vs. ETP | Validation n screen |
|-----|----------------|--------------------------------------------------|---------------------|---------------------------|--------------------------|---------------------|---------------------------------------|----------------------|---------------------|
| 80  | TRCN0000478486 | GPR20 [3/3]                                      | Growth factors/RTKs | SK-N-BE(2)-C specific hit | 4.50                     | 4.45                | 4.48                                  | -0.87                | 1                   |
| 81  | TRCN0000491535 | NTRK3 [2/6]                                      |                     | SK-N-BE(2)-C specific hit | 4.04                     | 4.85                | 4.45                                  | -0.08                | 1                   |
| 82  | TRCN0000487741 | GRM3 [2/2]                                       | Growth factors/RTKs | SK-N-BE(2)-C specific hit | 4.03                     | 4.85                | 4.44                                  | -1.64                | 1                   |
| 83  | TRCN0000479853 | GPR183 [2/2]                                     |                     | SK-N-BE(2)-C specific hit | 4.61                     | 4.05                | 4.33                                  | -0.23                | 1                   |
| 84  | TRCN0000466719 | PIK3CA [8/11]                                    | PI3K/AKT            | Core hit                  | 3.84                     | 4.71                | 4.28                                  | 2.36                 | 1                   |
| 85  | TRCN0000474663 | FGF6 [1/1]                                       | Growth factors/RTKs | SK-N-BE(2)-C specific hit | 4.21                     | 4.23                | 4.22                                  | -2.65                | 1                   |
| 86  | TRCN0000492155 | HCAR3 [2/3]                                      | PI3K/AKT            | SK-N-BE(2)-C specific hit | 4.12                     | 4.27                | 4.20                                  | -0.76                | 1                   |
| 87  | TRCN0000488553 | AKT2 [2/5]                                       |                     | Core hit                  | 3.65                     | 4.65                | 4.15                                  | -3.27                | 1                   |
| 88  | TRCN0000488711 | FFAR4 [3/4]                                      | Growth factors/RTKs | SK-N-BE(2)-C specific hit | 3.48                     | 4.77                | 4.13                                  | -2.33                | 1                   |
| 89  | TRCN0000489086 | STK40 [4/5]                                      |                     | SK-N-BE(2)-C specific hit | 4.65                     | 3.59                | 4.12                                  | -0.46                | 1                   |
| 90  | TRCN0000471007 | SPATS2L [1/1]                                    | Growth factors/RTKs | SK-N-BE(2)-C specific hit | 4.12                     | 4.08                | 4.10                                  | 2.39                 | 1                   |
| 91  | TRCN0000489686 | HTR5A [1/4]                                      |                     | SK-N-BE(2)-C specific hit | 4.55                     | 3.63                | 4.09                                  | 0.12                 | 1                   |
| 92  | TRCN0000488761 | CNR1 [3/3]                                       | Growth factors/RTKs | SK-N-BE(2)-C specific hit | 3.83                     | 4.22                | 4.03                                  | -0.42                | 1                   |
| 93  | TRCN0000489575 | BRAF [2/5]                                       |                     | SK-N-BE(2)-C specific hit | 4.25                     | 3.72                | 3.99                                  | -2.07                | 1                   |
| 94  | TRCN0000488215 | GRM2 [2/3]                                       | Growth factors/RTKs | SK-N-BE(2)-C specific hit | 3.79                     | 4.10                | 3.95                                  | -1.97                | 1                   |
| 95  | TRCN0000472203 | FFAR4 [3/4]                                      |                     | SK-N-BE(2)-C specific hit | 3.68                     | 4.17                | 3.93                                  | -0.94                | 1                   |
| 96  | TRCN0000477307 | GRM8 [5/5]                                       | Growth factors/RTKs | SK-N-BE(2)-C specific hit | 3.30                     | 4.53                | 3.92                                  | -0.57                | 1                   |
| 97  | TRCN0000467576 | DEPDC7 [1/1]                                     |                     | SK-N-BE(2)-C specific hit | 3.49                     | 4.29                | 3.89                                  | -0.78                | 1                   |
| 98  | TRCN0000491982 | P2RY12 [2/3]                                     | Growth factors/RTKs | SK-N-BE(2)-C specific hit | 3.35                     | 4.36                | 3.86                                  | -1.29                | 1                   |
| 99  | TRCN0000492109 | PPF1A1 [1/1]                                     |                     | SK-N-BE(2)-C specific hit | 3.36                     | 4.27                | 3.82                                  | 0.12                 | 1                   |
| 100 | TRCN0000474946 | RAF1 [1/3]                                       | Growth factors/RTKs | SK-N-BE(2)-C specific hit | 3.20                     | 4.28                | 3.74                                  | -2.32                | 1                   |
| 101 | TRCN0000489865 | GRM3 [2/2]                                       |                     | SK-N-BE(2)-C specific hit | 3.26                     | 4.21                | 3.74                                  | -0.49                | 1                   |
| 102 | TRCN0000489666 | GRM8 [5/5]                                       | Apoptosis           | SK-N-BE(2)-C specific hit | 3.29                     | 4.02                | 3.66                                  | -0.46                | 1                   |
| 103 | TRCN0000466971 | BCL2L2 [1/1]                                     |                     | Core hit                  | 3.07                     | 4.23                | 3.65                                  | 0.48                 | 1                   |
| 104 | TRCN0000477891 | ZBTB39 [1/1]                                     | Growth factors/RTKs | SK-N-BE(2)-C specific hit | 3.76                     | 3.52                | 3.64                                  | -2.94                | 1                   |
| 105 | TRCN0000489033 | GRM2 [2/3]                                       |                     | SK-N-BE(2)-C specific hit | 3.01                     | 4.23                | 3.62                                  | -2.05                | 1                   |
| 106 | TRCN0000491613 | RXFP4 [2/3]                                      | Growth factors/RTKs | SK-N-BE(2)-C specific hit | 3.48                     | 3.73                | 3.61                                  | 0.54                 | 1                   |
| 107 | TRCN0000472808 | GDNF [1/1]                                       |                     | SK-N-BE(2)-C specific hit | 3.46                     | 3.71                | 3.59                                  | 0.32                 | 1                   |
| 108 | TRCN0000489538 | FFAR4 [3/4]                                      | Growth factors/RTKs | SK-N-BE(2)-C specific hit | 3.04                     | 4.03                | 3.54                                  | -2.53                | 1                   |
| 109 | TRCN0000474239 | ADORA3 [2/3]                                     |                     | SK-N-BE(2)-C specific hit | 4.46                     | 2.60                | 3.53                                  | -0.25                | 1                   |
| 110 | TRCN0000480740 | STK40 [4/5]                                      | Growth factors/RTKs | SK-N-BE(2)-C specific hit | 3.73                     | 3.29                | 3.51                                  | -1.83                | 1                   |
| 111 | TRCN0000488765 | ROS1 [1/1]                                       |                     | SK-N-BE(2)-C specific hit | 2.80                     | 4.20                | 3.50                                  | -1.67                | 1                   |
| 112 | TRCN0000489590 | EGFR [2/12]                                      | Growth factors/RTKs | SK-N-BE(2)-C specific hit | 2.42                     | 4.49                | 3.46                                  | -0.79                | 1                   |
| 113 | TRCN0000470229 | THRB [1/2]                                       |                     | SK-N-BE(2)-C specific hit | 3.33                     | 3.57                | 3.45                                  | 0.88                 | 1                   |
| 114 | TRCN0000476850 | ZBTB20 [1/1]                                     | Growth factors/RTKs | SK-N-BE(2)-C specific hit | 3.19                     | 3.69                | 3.44                                  | 0.74                 | 1                   |
| 115 | TRCN0000476022 | FGF5 [1/1]                                       |                     | SK-N-BE(2)-C specific hit | 3.70                     | 3.13                | 3.42                                  | 0.50                 | 1                   |
| 116 | TRCN0000487732 | P2RY12 [2/3]                                     | Growth factors/RTKs | SK-N-BE(2)-C specific hit | 2.78                     | 4.04                | 3.41                                  | -0.27                | 1                   |
| 117 | TRCN0000489911 | CNSK1A1L [1/4]                                   |                     | SK-N-BE(2)-C specific hit | 3.74                     | 3.06                | 3.40                                  | 1.24                 | 1                   |
| 118 | TRCN0000470239 | FFAR3 [2/2]                                      | Growth factors/RTKs | SK-N-BE(2)-C specific hit | 3.05                     | 3.67                | 3.36                                  | -0.30                | 1                   |
| 119 | TRCN0000488834 | PTGER3 [2/6]                                     |                     | SK-N-BE(2)-C specific hit | 2.91                     | 3.77                | 3.34                                  | -0.76                | 1                   |
| 120 | TRCN0000491390 | EGFR [2/12]                                      | Growth factors/RTKs | SK-N-BE(2)-C specific hit | 2.97                     | 3.66                | 3.32                                  | -3.21                | 1                   |
| 121 | TRCN0000479087 | ETS2 [1/2]                                       |                     | SK-N-BE(2)-C specific hit | 3.06                     | 3.41                | 3.24                                  | -0.55                | 1                   |
| 122 | TRCN0000480161 | STK40 [4/5]                                      | Growth factors/RTKs | SK-N-BE(2)-C specific hit | 3.43                     | 2.96                | 3.20                                  | -0.94                | 1                   |
| 123 | TRCN0000465444 | FLT3 [1/8]                                       |                     | SK-N-BE(2)-C specific hit | 2.56                     | 3.82                | 3.19                                  | 1.07                 | 1                   |
| 124 | TRCN0000491640 | CXCR1 [3/3]                                      | Growth factors/RTKs | SK-N-BE(2)-C specific hit | 3.19                     | 3.17                | 3.18                                  | 0.19                 | 1                   |
| 125 | TRCN0000489021 | RXFP4 [2/3]                                      |                     | SK-N-BE(2)-C specific hit | 3.03                     | 3.33                | 3.18                                  | 0.76                 | 1                   |
| 126 | TRCN0000488387 | FFAR3 [2/2]                                      | Growth factors/RTKs | SK-N-BE(2)-C specific hit | 2.72                     | 3.55                | 3.14                                  | -1.01                | 1                   |
| 127 | TRCN0000473856 | ARL4C [1/1]                                      |                     | SK-N-BE(2)-C specific hit | 3.24                     | 2.98                | 3.11                                  | 0.47                 | 1                   |
| 128 | TRCN0000479725 | CNR1 [3/3]                                       | Growth factors/RTKs | SK-N-BE(2)-C specific hit | 3.13                     | 3.06                | 3.10                                  | -0.35                | 1                   |
| 129 | TRCN0000468563 | ARL4D [1/1]                                      |                     | SK-N-BE(2)-C specific hit | 3.22                     | 2.92                | 3.07                                  | 1.05                 | 1                   |
| 130 | TRCN0000474390 | SSBP2 [1/1]                                      | Cell cycle          | Core hit                  | 3.32                     | 2.80                | 3.06                                  | -1.43                | 1                   |
| 131 | TRCN0000467811 | CCND2 [1/1]                                      |                     | Core hit                  | 2.96                     | 3.14                | 3.05                                  | 0.63                 | 1                   |
| 132 | TRCN0000489453 | CYSLTR1 [1/4]                                    | Growth factors/RTKs | SK-N-BE(2)-C specific hit | 2.75                     | 3.30                | 3.03                                  | 0.27                 | 1                   |
| 133 | TRCN0000477429 | HCAR1 [2/2]                                      |                     | SK-N-BE(2)-C specific hit | 2.74                     | 3.29                | 3.02                                  | -1.22                | 1                   |
| 134 | TRCN0000492361 | DRD2 [2/4]                                       | Growth factors/RTKs | SK-N-BE(2)-C specific hit | 2.98                     | 3.01                | 3.00                                  | -0.21                | 1                   |
| 135 | TRCN0000468660 | YES1 [1/2]                                       |                     | SK-N-BE(2)-C specific hit | 3.19                     | 2.80                | 3.00                                  | 0.02                 | 1                   |
| 136 | TRCN0000472927 | PDGFRA [2/4]                                     | Growth factors/RTKs | SK-N-BE(2)-C specific hit | 2.64                     | 3.34                | 2.99                                  | -0.38                | 1                   |
| 137 | TRCN0000488960 | GAB2 [1/2]                                       |                     | SK-N-BE(2)-C specific hit | 2.58                     | 3.37                | 2.98                                  | -1.08                | 1                   |
| 138 | TRCN0000489177 | GRM7 [2/3]                                       | Growth factors/RTKs | SK-N-BE(2)-C specific hit | 2.94                     | 3.01                | 2.98                                  | -0.88                | 0                   |
| 139 | TRCN0000467360 | C1orf111 [1/1]                                   |                     | SK-N-BE(2)-C specific hit | 2.81                     | 3.10                | 2.96                                  | -0.15                | 1                   |
| 140 | TRCN0000489494 | BRAF [2/5]                                       | Growth factors/RTKs | SK-N-BE(2)-C specific hit | 2.52                     | 3.37                | 2.95                                  | -3.42                | 0                   |
| 141 | TRCN0000467736 | MCL1 [1/1]                                       |                     | SK-N-BE(2)-C specific hit | 2.65                     | 3.22                | 2.94                                  | 0.44                 | 1                   |
| 142 | TRCN0000492171 | CHRM2 [1/3]                                      | Growth factors/RTKs | SK-N-BE(2)-C specific hit | 2.76                     | 3.11                | 2.94                                  | 0.40                 | 0                   |
| 143 | TRCN0000489523 | AGTR2 [1/2]                                      |                     | SK-N-BE(2)-C specific hit | 2.99                     | 2.87                | 2.93                                  | -0.07                | 1                   |
| 144 | TRCN0000489148 | GRM7 [2/3]                                       | Growth factors/RTKs | SK-N-BE(2)-C specific hit | 2.60                     | 3.25                | 2.93                                  | -0.74                | 0                   |
| 145 | TRCN0000469846 | CYYR1 [1/1]                                      |                     | SK-N-BE(2)-C specific hit | 2.72                     | 3.07                | 2.90                                  | 0.94                 | 1                   |
| 146 | TRCN0000487757 | PTGER3 [2/6]                                     | Cell cycle          | SK-N-BE(2)-C specific hit | 2.92                     | 2.85                | 2.89                                  | -0.68                | 1                   |
| 147 | TRCN0000491742 | CDK4 [1/3]                                       |                     | Core hit                  | 2.91                     | 2.80                | 2.86                                  | 1.31                 | 0                   |
| 148 | TRCN0000489434 | CXCR2 [1/2]                                      | Growth factors/RTKs | SK-N-BE(2)-C specific hit | 2.60                     | 3.08                | 2.84                                  | -1.16                | 1                   |
| 149 | TRCN0000488636 | CNR1 [3/3]                                       |                     | SK-N-BE(2)-C specific hit | 2.40                     | 3.27                | 2.84                                  | -0.35                | 1                   |
| 150 | TRCN0000488273 | DRD2 [2/4]                                       | Growth factors/RTKs | SK-N-BE(2)-C specific hit | 2.42                     | 3.02                | 2.72                                  | -1.69                | 0                   |
| 151 | TRCN0000466384 | NFYB [1/1]                                       |                     | SK-N-BE(2)-C specific hit | 2.66                     | 2.68                | 2.67                                  | -0.44                | 1                   |
| 152 | TRCN0000489184 | IL10RB [1/2]                                     | Growth factors/RTKs | Core hit                  | 2.62                     | 2.68                | 2.65                                  | 1.31                 | 0                   |
| 153 | TRCN0000491439 | CCR3 [1/3]                                       |                     | SK-N-BE(2)-C specific hit | 2.51                     | 2.72                | 2.62                                  | 0.69                 | 1                   |
| 154 | TRCN0000491939 | KIT [1/7]                                        | Growth factors/RTKs | SK-N-BE(2)-C specific hit | 2.57                     | 2.66                | 2.62                                  | -3.63                | 0                   |

Table S2, Related to Figure 1. List of hits for the genome-wide ORF resistance screen in the LAN-1 cell line.

| #  | Construct ID   | Gene [# ORF hits per gene/total # ORFs per gene] | Pathway    | Hit specificity    | z-score I-BET151 vs. ETP | z-score JQ1 vs. ETP | Av. z-scores I-BET151 and JQ1 vs. ETP | z-score DMSO vs. ETP | Validation screen |
|----|----------------|--------------------------------------------------|------------|--------------------|--------------------------|---------------------|---------------------------------------|----------------------|-------------------|
| 1  | TRCN0000480014 | AXL [2/3]                                        |            | LAN-1 specific hit | 5.85                     | 7.49                | 6.67                                  | 1.98                 | 1                 |
| 2  | TRCN0000470181 | CCND3 [1/1]                                      | Cell cycle | Core hit           | 5.51                     | 7.28                | 6.40                                  | 1.29                 | 1                 |
| 3  | TRCN0000488331 | CDK6 [3/3]                                       | Cell cycle | Core hit           | 6.22                     | 5.92                | 6.07                                  | 2.50                 | 1                 |
| 4  | TRCN0000489649 | AXL [2/3]                                        |            | LAN-1 specific hit | 4.23                     | 6.54                | 5.39                                  | 1.01                 | 1                 |
| 5  | TRCN0000474343 | CCNE2 [1/2]                                      | Cell cycle | Core hit           | 4.89                     | 5.57                | 5.23                                  | 0.72                 | 1                 |
| 6  | TRCN0000491742 | CDK4 [2/3]                                       | Cell cycle | Core hit           | 5.14                     | 4.58                | 4.86                                  | 1.46                 | 1                 |
| 7  | TRCN0000488281 | PIM3 [3/3]                                       |            | LAN-1 specific hit | 4.44                     | 5.04                | 4.74                                  | 2.92                 | 1                 |
| 8  | TRCN0000489868 | AKT2 [1/5]                                       | PI3K/AKT   | Core hit           | 3.63                     | 5.76                | 4.70                                  | 4.66                 | 1                 |
| 9  | TRCN0000489876 | TYRO3 [2/4]                                      |            | LAN-1 specific hit | 3.53                     | 5.66                | 4.60                                  | 0.38                 | 1                 |
| 10 | TRCN0000489909 | PIM1 [3/3]                                       |            | LAN-1 specific hit | 3.99                     | 4.96                | 4.48                                  | 3.91                 | 0                 |
| 11 | TRCN0000467546 | CDK6 [3/3]                                       | Cell cycle | Core hit           | 4.30                     | 4.52                | 4.41                                  | 1.87                 | 1                 |
| 12 | TRCN0000479963 | TYRO3 [2/4]                                      |            | LAN-1 specific hit | 3.24                     | 5.08                | 4.16                                  | 0.54                 | 1                 |
| 13 | TRCN0000481165 | CDK6 [3/3]                                       | Cell cycle | Core hit           | 4.06                     | 4.01                | 4.04                                  | 1.40                 | 1                 |
| 14 | TRCN0000466006 | PIM1 [3/3]                                       |            | LAN-1 specific hit | 3.46                     | 4.10                | 3.78                                  | 2.81                 | 0                 |
| 15 | TRCN0000489631 | PIM2 [2/3]                                       |            | LAN-1 specific hit | 3.39                     | 4.13                | 3.76                                  | 3.31                 | 0                 |
| 16 | TRCN0000467216 | CCND1 [1/1]                                      | Cell cycle | Core hit           | 3.01                     | 4.46                | 3.74                                  | 0.50                 | 1                 |
| 17 | TRCN0000488146 | PIM3 [3/3]                                       |            | LAN-1 specific hit | 3.16                     | 4.23                | 3.70                                  | 2.32                 | 1                 |
| 18 | TRCN0000472603 | BCL2L1 [2/2]                                     | Apoptosis  | Core hit           | 3.67                     | 3.56                | 3.62                                  | 0.40                 | 1                 |
| 19 | TRCN0000474390 | SSBP2 [1/1]                                      |            | Core hit           | 3.23                     | 3.74                | 3.49                                  | 0.83                 | 1                 |
| 20 | TRCN0000480123 | CDK4 [2/3]                                       | Cell cycle | Core hit           | 3.81                     | 3.09                | 3.45                                  | 0.47                 | 1                 |
| 21 | TRCN0000481389 | PIM1 [3/3]                                       |            | LAN-1 specific hit | 2.88                     | 3.83                | 3.36                                  | 2.78                 | 0                 |
| 22 | TRCN0000489184 | IL10RB [2/2]                                     |            | Core hit           | 3.13                     | 3.55                | 3.34                                  | 1.82                 | 1                 |
| 23 | TRCN0000489920 | BCL2L1 [2/2]                                     | Apoptosis  | Core hit           | 3.06                     | 3.50                | 3.28                                  | 0.36                 | 1                 |
| 24 | TRCN0000487677 | AKT3 [1/5]                                       | PI3K/AKT   | LAN-1 specific hit | 3.03                     | 3.40                | 3.22                                  | 1.25                 | 1                 |
| 25 | TRCN0000491449 | MAP3K8 [1/3]                                     |            | LAN-1 specific hit | 2.78                     | 3.39                | 3.09                                  | 0.47                 | 1                 |
| 26 | TRCN0000475569 | PIM3 [3/3]                                       |            | LAN-1 specific hit | 2.84                     | 3.31                | 3.08                                  | 1.82                 | 1                 |
| 27 | TRCN0000466971 | BCL2L2 [1/1]                                     | Apoptosis  | Core hit           | 2.90                     | 3.10                | 3.00                                  | 0.29                 | 1                 |
| 28 | TRCN0000466782 | TGIF2 [1/1]                                      |            | LAN-1 specific hit | 2.56                     | 3.4                 | 2.98                                  | 0.36                 | 1                 |
| 29 | TRCN0000491814 | AKT1 [1/4]                                       | PI3K/AKT   | Core hit           | 2.69                     | 3.27                | 2.98                                  | 1.99                 | 1                 |
| 30 | TRCN0000487730 | PIK3CA [1/11]                                    | PI3K/AKT   | Core hit           | 2.75                     | 3.16                | 2.96                                  | -0.24                | 1                 |
| 31 | TRCN0000478988 | TGIF1 [1/2]                                      |            | LAN-1 specific hit | 2.70                     | 3.12                | 2.91                                  | 0.13                 | 1                 |
| 32 | TRCN0000488585 | PIM2 [2/3]                                       |            | LAN-1 specific hit | 2.56                     | 3.21                | 2.89                                  | 2.61                 | 0                 |
| 33 | TRCN0000491760 | IL10RB [2/2]                                     |            | Core hit           | 2.74                     | 3.00                | 2.87                                  | 1.84                 | 1                 |
| 34 | TRCN0000467811 | CCND2 [1/1]                                      | Cell cycle | Core hit           | 2.52                     | 2.87                | 2.70                                  | 0.11                 | 1                 |

**Table S3, Related to Figure 1. Results of the mini-ORF rescue screen in LAN-1 and CHP-212 cells.**

| #  | Category | Gene symbol | Pathway                   | Genome-wide ORF screen: SK-N-BE(2)-C |                          |                     | Genome-wide ORF screen: LAN-1 |                |                          |                     | Validation ORF screen: LAN-1 |                |                     | CHP-212 | Validation screen hit |
|----|----------|-------------|---------------------------|--------------------------------------|--------------------------|---------------------|-------------------------------|----------------|--------------------------|---------------------|------------------------------|----------------|---------------------|---------|-----------------------|
|    |          |             |                           | Construct ID                         | z-score I-BET151 vs. ETP | z-score JQ1 vs. ETP | Genome-wide screen hit        | Construct ID   | z-score I-BET151 vs. ETP | z-score JQ1 vs. ETP | Genome-wide screen hit       | Construct ID   | z-score JQ1 vs. ETP |         |                       |
| 1  | Hit      | CCND3       | Cell cycle                | TRCN0000470181                       | 6.56                     | 6.42                | 1                             | TRCN0000470181 | 5.51                     | 7.28                | 1                            | TRCN0000470181 | 6.46                | -0.45   | 0                     |
| 2  | Hit      | AXL         | LAN-1 specific hit        | TRCN0000480014                       | 1.43                     | 1.9                 | 0                             | TRCN0000480014 | 5.85                     | 7.49                | 1                            | TRCN0000480014 | 6.06                | 0.17    | 0                     |
| 3  | Hit      | TYRO3       | LAN-1 specific hit        | TRCN0000479963                       | 0.47                     | 0.63                | 0                             | TRCN0000489876 | 3.53                     | 5.66                | 1                            | TRCN0000489876 | 5.62                | -4.09   | 0                     |
| 4  | Hit      | CCNE2       | Cell cycle                | TRCN0000474343                       | 5.81                     | 5.84                | 1                             | TRCN0000474343 | 4.89                     | 5.57                | 1                            | TRCN0000474343 | 5.24                | 0.38    | 0                     |
| 5  | Hit      | CCND1       | Cell cycle                | TRCN0000467216                       | 4.64                     | 4.33                | 1                             | TRCN0000467216 | 3.01                     | 4.46                | 1                            | TRCN0000467216 | 4.32                | 2.08    | 1                     |
| 6  | Hit      | CDK6        | Cell cycle                | TRCN0000488331                       | 6.92                     | 5.42                | 1                             | TRCN0000488331 | 6.22                     | 5.92                | 1                            | TRCN0000488331 | 4.04                | -0.05   | 0                     |
| 7  | Hit      | CDK4        | Cell cycle                | TRCN0000491742                       | 2.91                     | 2.8                 | 1                             | TRCN0000491742 | 5.14                     | 4.58                | 1                            | TRCN0000491742 | 3.61                | -0.27   | 0                     |
| 8  | Hit      | BCL2L1      | Apoptosis                 | TRCN0000489920                       | 3.74                     | 5.66                | 1                             | TRCN0000472603 | 3.67                     | 3.56                | 1                            | TRCN0000489920 | 3.49                | -0.53   | 0                     |
| 9  | Hit      | TGIF2       | LAN-1 specific hit        | TRCN0000466782                       | -0.59                    | -2.63               | 0                             | TRCN0000466782 | 2.56                     | 3.40                | 1                            | TRCN0000466782 | 3.38                | -0.02   | 0                     |
| 10 | Hit      | SSBP2       | LAN-1 specific hit        | TRCN0000474390                       | 3.32                     | 2.8                 | 1                             | TRCN0000474390 | 3.23                     | 3.74                | 1                            | TRCN0000474390 | 3.31                | -0.72   | 0                     |
| 11 | Hit      | TGIF1       | LAN-1 specific hit        | TRCN0000475377                       | -0.47                    | -0.57               | 0                             | TRCN0000478988 | 2.70                     | 3.12                | 1                            | TRCN0000478988 | 3.31                | -1.36   | 0                     |
| 12 | Hit      | MAP3K8      | LAN-1 specific hit        | TRCN0000491449                       | 1.96                     | 2.87                | 0                             | TRCN0000491449 | 2.78                     | 3.39                | 1                            | TRCN0000491449 | 3.27                | 0.04    | 0                     |
| 13 | Hit      | BCL2L2      | Apoptosis                 | TRCN0000466971                       | 3.07                     | 4.23                | 1                             | TRCN0000466971 | 2.90                     | 3.10                | 1                            | TRCN0000466971 | 3.14                | 0.45    | 0                     |
| 14 | Hit      | CCND2       | Cell cycle                | TRCN0000467811                       | 2.96                     | 3.14                | 1                             | TRCN0000467811 | 2.52                     | 2.87                | 1                            | TRCN0000467811 | 3.07                | 0.08    | 0                     |
| 15 | Hit      | PIK3CA      | PI3K/AKT                  | TRCN0000487714                       | 5.69                     | 7.4                 | 1                             | TRCN0000487730 | 2.75                     | 3.16                | 1                            | TRCN0000487714 | 2.95                | 2.01    | 1                     |
| 16 | Hit      | AKT1        | PI3K/AKT                  | TRCN0000488923                       | 8.85                     | 8.04                | 1                             | TRCN0000489962 | 2.06                     | 5.13                | 1                            | TRCN0000488923 | 2.82                | 0.97    | 1                     |
| 17 | Hit      | AKT3        | PI3K/AKT                  | TRCN0000489669                       | 2.48                     | 2.12                | 0                             | TRCN0000487677 | 3.03                     | 3.40                | 1                            | TRCN0000487677 | 2.61                | 0.35    | 0                     |
| 18 | Hit      | PIM3        | LAN-1 specific hit        | TRCN0000475569                       | 1.59                     | 1.35                | 0                             | TRCN0000488281 | 4.44                     | 5.04                | 1                            | TRCN0000488146 | 2.51                | -1.28   | 0                     |
| 19 | Hit      | IL10RB      | LAN-1 specific hit        | TRCN0000489184                       | 2.62                     | 2.68                | 1                             | TRCN0000489184 | 3.13                     | 3.55                | 1                            | TRCN0000489184 | 2.26                | 0.24    | 0                     |
| 20 | Hit      | AKT2        | PI3K/AKT                  | TRCN0000489868                       | 6.59                     | 7.41                | 1                             | TRCN0000489868 | 3.63                     | 5.76                | 1                            | TRCN0000489868 | 2.00                | 0.19    | 0                     |
| 21 | Hit      | PDGFRA      | Growth factors/RTKs       | TRCN0000491475                       | 4.45                     | 5.33                | 1                             | TRCN0000489486 | 1.89                     | 2.73                | 0                            | TRCN0000491475 | 3.68                | 0.31    | 0                     |
| 22 | Hit      | KIT         | SK-N-BE(2)-C specific hit | TRCN0000491939                       | 2.57                     | 2.66                | 1                             | TRCN0000491939 | 0.48                     | 1.75                | 0                            | TRCN0000491939 | 3.25                | 1.67    | 1                     |
| 23 | Hit      | NTRK3       | SK-N-BE(2)-C specific hit | TRCN0000489478                       | 4.88                     | 5.4                 | 1                             | TRCN0000489478 | 1.62                     | 1.61                | 0                            | TRCN0000489478 | 2.13                | -0.08   | 0                     |
| 24 | Hit      | KRAS        | SK-N-BE(2)-C specific hit | TRCN0000488343                       | 7.8                      | 9.52                | 1                             | TRCN0000488343 | 1.96                     | 1.94                | 0                            | TRCN0000488343 | 1.75                | -0.03   | 0                     |
| 25 | Hit      | GAB2        | SK-N-BE(2)-C specific hit | TRCN0000488960                       | 2.58                     | 3.37                | 1                             | TRCN0000488960 | 0.99                     | 1.04                | 0                            | TRCN0000488960 | 1.67                | 0.21    | 0                     |
| 26 | Hit      | FGFR2       | Growth factors/RTKs       | TRCN0000465402                       | 4.54                     | 6.12                | 1                             | TRCN0000492076 | 0.60                     | 1.45                | 0                            | TRCN0000465402 | 1.61                | 0.48    | 0                     |
| 27 | Hit      | EGFR        | Growth factors/RTKs       | TRCN0000489590                       | 2.42                     | 4.49                | 1                             | TRCN0000488104 | 0.02                     | 0.12                | 0                            | TRCN0000491390 | 1.40                | 1.00    | 0                     |
| 28 | Hit      | TOX         | SK-N-BE(2)-C specific hit | TRCN0000469233                       | 9.66                     | 7.06                | 1                             | TRCN0000469233 | 1.15                     | 1.12                | 0                            | TRCN0000469233 | 1.26                | -0.18   | 0                     |
| 29 | Hit      | LTB4R       | SK-N-BE(2)-C specific hit | TRCN0000488896                       | 5.29                     | 3.88                | 1                             | TRCN0000491676 | -0.22                    | -0.22               | 0                            | TRCN0000488896 | 1.25                | 0.16    | 0                     |
| 30 | Hit      | GDNF        | SK-N-BE(2)-C specific hit | TRCN0000472808                       | 3.46                     | 3.71                | 1                             | TRCN0000472808 | 0.84                     | 1.33                | 0                            | TRCN0000472808 | 1.12                | 0.42    | 0                     |
| 31 | Hit      | THRB        | SK-N-BE(2)-C specific hit | TRCN0000470229                       | 3.33                     | 3.57                | 1                             | TRCN0000470229 | 0.62                     | 0.60                | 0                            | TRCN0000470229 | 1.08                | 0.12    | 0                     |
| 32 | Hit      | ROS1        | SK-N-BE(2)-C specific hit | TRCN0000488765                       | 2.8                      | 4.2                 | 1                             | TRCN0000488765 | 0.97                     | 0.97                | 0                            | TRCN0000488765 | 1.08                | -3.69   | 0                     |
| 33 | Hit      | ARL4C       | SK-N-BE(2)-C specific hit | TRCN0000473856                       | 3.24                     | 2.98                | 1                             | TRCN0000473856 | 0.96                     | 0.73                | 0                            | TRCN0000473856 | 0.95                | 0.13    | 0                     |
| 34 | Hit      | SPATS2L     | SK-N-BE(2)-C specific hit | TRCN0000471007                       | 4.12                     | 4.08                | 1                             | TRCN0000471007 | 0.67                     | 0.58                | 0                            | TRCN0000471007 | 0.94                | 0.08    | 0                     |
| 35 | Hit      | ZBTB39      | SK-N-BE(2)-C specific hit | TRCN0000477891                       | 3.76                     | 3.52                | 1                             | TRCN0000477891 | 0.32                     | 0.23                | 0                            | TRCN0000477891 | 0.94                | 0.51    | 0                     |
| 36 | Hit      | FGF5        | Growth factors/RTKs       | TRCN0000476022                       | 3.7                      | 3.13                | 1                             | TRCN0000476022 | 0.83                     | 1.17                | 0                            | TRCN0000476022 | 0.88                | 0.61    | 0                     |
| 37 | Hit      | RAF1        | SK-N-BE(2)-C specific hit | TRCN0000474946                       | 3.2                      | 4.28                | 1                             | TRCN0000474946 | 0.67                     | 0.40                | 0                            | TRCN0000474946 | 0.84                | 0.10    | 0                     |
| 38 | Hit      | YES1        | SK-N-BE(2)-C specific hit | TRCN0000468660                       | 3.19                     | 2.8                 | 1                             | TRCN0000468660 | 0.84                     | 0.50                | 0                            | TRCN0000468660 | 0.83                | -0.08   | 0                     |
| 39 | Hit      | ARL4D       | SK-N-BE(2)-C specific hit | TRCN0000468563                       | 3.22                     | 2.92                | 1                             | TRCN0000468563 | 0.97                     | 0.94                | 0                            | TRCN0000468563 | 0.83                | 0.19    | 0                     |
| 40 | Hit      | FGF6        | SK-N-BE(2)-C specific hit | TRCN0000474663                       | 4.21                     | 4.23                | 1                             | TRCN0000474663 | -2.85                    | -1.31               | 0                            | TRCN0000474663 | 0.82                | -1.83   | 0                     |
| 41 | Hit      | BRAF        | SK-N-BE(2)-C specific hit | TRCN0000489575                       | 4.25                     | 3.72                | 1                             | TRCN0000489575 | 1.07                     | 0.44                | 0                            | TRCN0000489575 | 0.76                | -0.20   | 0                     |
| 42 | Hit      | DEPDC7      | SK-N-BE(2)-C specific hit | TRCN0000467576                       | 3.49                     | 4.29                | 1                             | TRCN0000467576 | 0.31                     | 0.41                | 0                            | TRCN0000467576 | 0.75                | 0.20    | 0                     |
| 43 | Hit      | HCAR3       | SK-N-BE(2)-C specific hit | TRCN0000489482                       | 4.54                     | 5                   | 1                             | TRCN0000491859 | 0.34                     | 0.31                | 0                            | TRCN0000489482 | 0.57                | 0.07    | 0                     |
| 44 | Hit      | GPR183      | Growth factors/RTKs       | TRCN0000487905                       | 4.69                     | 4.86                | 1                             | TRCN0000479853 | 1.71                     | 1.40                | 0                            | TRCN0000487905 | 0.52                | 0.19    | 0                     |
| 45 | Hit      | FLT3        | SK-N-BE(2)-C specific hit | TRCN0000465444                       | 2.56                     | 3.82                | 1                             | TRCN0000488186 | -0.25                    | 1.28                | 0                            | TRCN0000465444 | 0.46                | 0.22    | 0                     |
| 46 | Hit      | CNR1        | SK-N-BE(2)-C specific hit | TRCN0000488761                       | 3.83                     | 4.22                | 1                             | TRCN0000488761 | 0.63                     | 0.47                | 0                            | TRCN0000488761 | 0.45                | 0.98    | 0                     |
| 47 | Hit      | SUCNR1      | SK-N-BE(2)-C specific hit | TRCN0000489472                       | 5.31                     | 5.98                | 1                             | TRCN0000489472 | 0.71                     | 0.61                | 0                            | TRCN0000489472 | 0.45                | 0.19    | 0                     |
| 48 | Hit      | CHRM2       | SK-N-BE(2)-C specific hit | TRCN0000492171                       | 2.76                     | 3.11                | 1                             | TRCN0000492120 | 0.52                     | 0.19                | 0                            | TRCN0000492171 | 0.42                | -0.69   | 0                     |
| 49 | Hit      | HTR1D       | SK-N-BE(2)-C specific hit | TRCN0000466228                       | 5.4                      | 5.66                | 1                             | TRCN0000487810 | 0.25                     | 0.25                | 0                            | TRCN0000466228 | 0.42                | 0.01    | 0                     |
| 50 | Hit      | STK40       | SK-N-BE(2)-C specific hit | TRCN0000491586                       | 5.62                     | 4.42                | 1                             | TRCN0000478606 | 0.55                     | 0.45                | 0                            | TRCN0000491586 | 0.37                | 0.11    | 0                     |
| 51 | Hit      | ETS2        | SK-N-BE(2)-C specific hit | TRCN0000479087                       | 3.06                     | 3.41                | 1                             | TRCN0000479087 | 0.01                     | 0.20                | 0                            | TRCN0000479087 | 0.37                | 0.37    | 0                     |
| 52 | Hit      | CYSLTR1     | SK-N-BE(2)-C specific hit | TRCN0000489453                       | 2.75                     | 3.3                 | 1                             | TRCN0000489453 | 0.32                     | 0.40                | 0                            | TRCN0000489453 | 0.34                | 1.35    | 0                     |
| 53 | Hit      | ZBTB20      | SK-N-BE(2)-C specific hit | TRCN0000476850                       | 3.19                     | 3.69                | 1                             | TRCN0000476850 | 0.78                     | 1.39                | 0                            | TRCN0000476850 | 0.34                | 0.19    | 0                     |
| 54 | Hit      | HTR1F       | SK-N-BE(2)-C specific hit | TRCN0000489611                       | 5.94                     | 5.61                | 1                             | TRCN0000489793 | 0.93                     | 0.84                | 0                            | TRCN0000489611 | 0.33                | 0.49    | 0                     |
| 55 | Hit      | DRD2        | SK-N-BE(2)-C specific hit | TRCN0000492361                       | 2.98                     | 3.01                | 1                             | TRCN0000492361 | 0.15                     | 0.16                | 0                            | TRCN0000492361 | 0.30                | -0.29   | 0                     |
| 56 | Hit      | RASGRP1     | SK-N-BE(2)-C specific hit | TRCN0000489632                       | 4.73                     | 5.2                 | 1                             | TRCN0000489632 | 0.07                     | 0.21                | 0                            | TRCN0000489632 | 0.23                | 0.18    | 0                     |
| 57 | Hit      | HCAR2       | SK-N-BE(2)-C specific hit | TRCN0000488076                       | 5.7                      | 6.64                | 1                             | TRCN0000488076 | 0.51                     | 0.15                | 0                            | TRCN0000488076 | 0.23                | -0.08   | 0                     |

| #   | Category        | Gene symbol | Pathway                   | Genome-wide ORF screen: SK-N-BE(2)-C |                          |                     | Genome-wide ORF screen: LAN-1 |                |                          |                     | Validation ORF screen: LAN-1 |                | CHP-212             | Validation screen hit |                     |
|-----|-----------------|-------------|---------------------------|--------------------------------------|--------------------------|---------------------|-------------------------------|----------------|--------------------------|---------------------|------------------------------|----------------|---------------------|-----------------------|---------------------|
|     |                 |             |                           | Construct ID                         | z-score I-BET151 vs. ETP | z-score JQ1 vs. ETP | Genome-wide screen hit        | Construct ID   | z-score I-BET151 vs. ETP | z-score JQ1 vs. ETP | Genome-wide screen hit       | Construct ID   | z-score JQ1 vs. ETP |                       | z-score JQ1 vs. ETP |
| 58  | Hit             | FFAR3       | SK-N-BE(2)-C specific hit | TRCN0000470239                       | 3.05                     | 3.67                | 1                             | TRCN0000488387 | 0.36                     | 0.11                | 0                            | TRCN0000470239 | 0.22                | 0.06                  | 0                   |
| 59  | Hit             | ADORA1      | SK-N-BE(2)-C specific hit | TRCN0000488625                       | 6.49                     | 7.11                | 1                             | TRCN0000470054 | 0.23                     | 0.33                | 0                            | TRCN0000488625 | 0.22                | 0.11                  | 0                   |
| 60  | Hit             | GRM7        | SK-N-BE(2)-C specific hit | TRCN0000489177                       | 2.94                     | 3.01                | 1                             | TRCN0000489177 | -0.47                    | -0.46               | 0                            | TRCN0000489177 | 0.17                | 0.25                  | 0                   |
| 61  | Hit             | MTNR1B      | SK-N-BE(2)-C specific hit | TRCN0000488432                       | 4.56                     | 4.96                | 1                             | TRCN0000488432 | 0.41                     | 0.59                | 0                            | TRCN0000488432 | 0.17                | 0.19                  | 0                   |
| 62  | Hit             | CXCR1       | SK-N-BE(2)-C specific hit | TRCN0000488528                       | 5.43                     | 5.59                | 1                             | TRCN0000491640 | 0.81                     | 0.52                | 0                            | TRCN0000488528 | 0.16                | 0.55                  | 0                   |
| 63  | Hit             | NFIB        | SK-N-BE(2)-C specific hit | TRCN0000468617                       | 5.67                     | 4.75                | 1                             | TRCN0000468617 | 0.42                     | -0.10               | 0                            | TRCN0000468617 | 0.13                | -0.15                 | 0                   |
| 64  | Hit             | PTGER3      | SK-N-BE(2)-C specific hit | TRCN0000488834                       | 2.91                     | 3.77                | 1                             | TRCN0000470039 | 0.82                     | 1.13                | 0                            | TRCN0000488834 | 0.12                | 0.13                  | 0                   |
| 65  | Hit             | P2RY13      | SK-N-BE(2)-C specific hit | TRCN0000466042                       | 4.3                      | 5.14                | 1                             | TRCN0000488388 | 0.67                     | 0.61                | 0                            | TRCN0000466042 | 0.08                | 1.68                  | 0                   |
| 66  | Hit             | GRM3        | SK-N-BE(2)-C specific hit | TRCN0000487741                       | 4.03                     | 4.85                | 1                             | TRCN0000489865 | 0.28                     | -0.10               | 0                            | TRCN0000487741 | -0.01               | 2.05                  | 0                   |
| 67  | Hit             | RXFP4       | SK-N-BE(2)-C specific hit | TRCN0000491613                       | 3.48                     | 3.73                | 1                             | TRCN0000489021 | 0.50                     | 0.20                | 0                            | TRCN0000491613 | -0.03               | 0.38                  | 0                   |
| 68  | Hit             | PPF1A       | SK-N-BE(2)-C specific hit | TRCN0000492109                       | 3.36                     | 4.27                | 1                             | TRCN0000492109 | -0.43                    | -1.57               | 0                            | TRCN0000492109 | -0.04               | 0.36                  | 0                   |
| 69  | Hit             | HTR1B       | SK-N-BE(2)-C specific hit | TRCN0000488224                       | 5.54                     | 5.68                | 1                             | TRCN0000471924 | 0.13                     | -0.12               | 0                            | TRCN0000488224 | -0.07               | 0.16                  | 0                   |
| 70  | Hit             | P2RY14      | SK-N-BE(2)-C specific hit | TRCN0000488505                       | 6.61                     | 7.32                | 1                             | TRCN0000488505 | 0.19                     | 0.29                | 0                            | TRCN0000488505 | -0.14               | 0.28                  | 0                   |
| 71  | Hit             | GRM2        | SK-N-BE(2)-C specific hit | TRCN0000488215                       | 3.79                     | 4.1                 | 1                             | TRCN0000488215 | -0.53                    | -0.73               | 0                            | TRCN0000488215 | -0.22               | 2.34                  | 0                   |
| 72  | Hit             | HTR5A       | SK-N-BE(2)-C specific hit | TRCN0000489686                       | 4.55                     | 3.63                | 1                             | TRCN0000475616 | 0.46                     | 0.25                | 0                            | TRCN0000489686 | -0.24               | 0.88                  | 0                   |
| 73  | Hit             | ADORA3      | SK-N-BE(2)-C specific hit | TRCN0000488502                       | 5.27                     | 4.17                | 1                             | TRCN0000474239 | 1.18                     | 0.93                | 0                            | TRCN0000488502 | -0.28               | -0.21                 | 0                   |
| 74  | Hit             | HTR1E       | SK-N-BE(2)-C specific hit | TRCN0000489111                       | 7.78                     | 7.22                | 1                             | TRCN0000475926 | 0.53                     | 0.72                | 0                            | TRCN0000489111 | -0.30               | 0.04                  | 0                   |
| 75  | Hit             | MTNR1A      | SK-N-BE(2)-C specific hit | TRCN0000492315                       | 8.59                     | 7.35                | 1                             | TRCN0000488582 | -0.19                    | 0.07                | 0                            | TRCN0000492315 | -0.31               | 0.03                  | 0                   |
| 76  | Hit             | GPR34       | Growth factors/RTKs       | TRCN0000489826                       | 6.75                     | 6.88                | 1                             | TRCN0000492042 | 1.05                     | 1.20                | 0                            | TRCN0000489826 | -0.34               | 0.93                  | 0                   |
| 77  | Hit             | CNR2        | SK-N-BE(2)-C specific hit | TRCN0000492091                       | 7.25                     | 7.83                | 1                             | TRCN0000488729 | -0.01                    | -0.30               | 0                            | TRCN0000492091 | -0.35               | 0.46                  | 0                   |
| 78  | Hit             | GPR20       | Growth factors/RTKs       | TRCN0000488074                       | 5.93                     | 5.55                | 1                             | TRCN0000478486 | -0.09                    | -0.21               | 0                            | TRCN0000488074 | -0.38               | -0.08                 | 0                   |
| 79  | Hit             | DRD3        | SK-N-BE(2)-C specific hit | TRCN0000488434                       | 5.2                      | 5.12                | 1                             | TRCN0000476045 | 0.41                     | 0.60                | 0                            | TRCN0000488434 | -0.40               | 0.29                  | 0                   |
| 80  | Hit             | CSNK1A1L    | SK-N-BE(2)-C specific hit | TRCN0000489911                       | 3.74                     | 3.06                | 1                             | TRCN0000479515 | -0.15                    | -0.17               | 0                            | TRCN0000489911 | -0.43               | -0.09                 | 0                   |
| 81  | Hit             | GPR22       | Growth factors/RTKs       | TRCN0000488708                       | 5.81                     | 6.95                | 1                             | TRCN0000469954 | 0.29                     | 0.23                | 0                            | TRCN0000488708 | -0.45               | 0.53                  | 0                   |
| 82  | Hit             | FFAR4       | SK-N-BE(2)-C specific hit | TRCN0000488711                       | 3.48                     | 4.77                | 1                             | TRCN0000472203 | -0.01                    | 0.22                | 0                            | TRCN0000488711 | -0.47               | 0.26                  | 0                   |
| 83  | Hit             | HCAR1       | SK-N-BE(2)-C specific hit | TRCN0000489708                       | 5.48                     | 5.98                | 1                             | TRCN0000477429 | 0.28                     | 0.28                | 0                            | TRCN0000489708 | -0.48               | 1.05                  | 0                   |
| 84  | Hit             | S1PR1       | SK-N-BE(2)-C specific hit | TRCN0000467249                       | 8.09                     | 7.44                | 1                             | TRCN0000487798 | -0.34                    | -0.60               | 0                            | TRCN0000467249 | -0.55               | 0.20                  | 0                   |
| 85  | Hit             | GPR82       | Growth factors/RTKs       | TRCN0000489463                       | 6.74                     | 7.67                | 1                             | TRCN0000489463 | -0.17                    | -0.42               | 0                            | TRCN0000489463 | -0.58               | 0.09                  | 0                   |
| 86  | Hit             | S1PR5       | SK-N-BE(2)-C specific hit | TRCN0000487761                       | 7.9                      | 6.67                | 1                             | TRCN0000487973 | -1.02                    | -0.63               | 0                            | TRCN0000487761 | -0.76               | 0.33                  | 0                   |
| 87  | Hit             | GRM8        | SK-N-BE(2)-C specific hit | TRCN0000492137                       | 4.77                     | 5.44                | 1                             | TRCN0000489225 | 0.06                     | -0.79               | 0                            | TRCN0000492137 | -0.78               | 0.19                  | 0                   |
| 88  | Hit             | S1PR4       | SK-N-BE(2)-C specific hit | TRCN0000489149                       | 6.4                      | 6.97                | 1                             | TRCN0000473906 | -0.01                    | 0.12                | 0                            | TRCN0000489149 | -0.91               | 0.15                  | 0                   |
| 89  | Hit             | NFIC        | SK-N-BE(2)-C specific hit | TRCN0000472445                       | 4.72                     | 5.23                | 1                             | TRCN0000472445 | -0.78                    | -1.59               | 0                            | TRCN0000472445 | -0.93               | -1.47                 | 0                   |
| 90  | Hit             | P2RY12      | SK-N-BE(2)-C specific hit | TRCN0000491982                       | 3.35                     | 4.36                | 1                             | TRCN0000470996 | -0.17                    | -0.32               | 0                            | TRCN0000491982 | -1.10               | 0.34                  | 0                   |
| 91  | Neutral control | ADD1        |                           | TRCN0000471276                       | 0.17                     | 0.27                | 0                             | TRCN0000471276 | 0.25                     | 0.40                | 0                            | TRCN0000471276 | 0.60                | -0.70                 | 0                   |
| 92  | Neutral control | ANKRD23     |                           | TRCN0000468423                       | 0.03                     | 0.18                | 0                             | TRCN0000468423 | 0.09                     | 0.41                | 0                            | TRCN0000468423 | 0.59                | 0.15                  | 0                   |
| 93  | Neutral control | ANKRD55     |                           | TRCN0000475370                       | 0.13                     | 0.39                | 0                             | TRCN0000475370 | 0.22                     | 0.48                | 0                            | TRCN0000475370 | 0.63                | 0.19                  | 0                   |
| 94  | Neutral control | C14orf159   |                           | TRCN0000466769                       | 0.16                     | 0.02                | 0                             | TRCN0000466769 | 0.27                     | 0.08                | 0                            | TRCN0000466769 | 0.23                | -0.65                 | 0                   |
| 95  | Neutral control | C9orf72     |                           | TRCN0000471027                       | 0.01                     | 0.42                | 0                             | TRCN0000471027 | 0.30                     | 0.24                | 0                            | TRCN0000471027 | 0.34                | -0.04                 | 0                   |
| 96  | Neutral control | CALR3       |                           | TRCN0000468886                       | 0.36                     | 0.12                | 0                             | TRCN0000468886 | -0.15                    | -0.09               | 0                            | TRCN0000468886 | 0.05                | 0.08                  | 0                   |
| 97  | Neutral control | CASP14      |                           | TRCN0000468053                       | 0.14                     | 0.39                | 0                             | TRCN0000468053 | 0.11                     | 0.18                | 0                            | TRCN0000468053 | 0.52                | 0.28                  | 0                   |
| 98  | Neutral control | CLEC3B      |                           | TRCN0000468526                       | 0.32                     | 0.26                | 0                             | TRCN0000468526 | 0.31                     | 0.25                | 0                            | TRCN0000468526 | 0.28                | -2.76                 | 0                   |
| 99  | Neutral control | DDAH1       |                           | TRCN0000477029                       | 0.02                     | 0.21                | 0                             | TRCN0000477029 | 0.07                     | 0.09                | 0                            | TRCN0000477029 | 0.18                | -1.74                 | 0                   |
| 100 | Neutral control | DKK3        |                           | TRCN0000472220                       | 0.30                     | 0.36                | 0                             | TRCN0000472220 | 0.43                     | 0.23                | 0                            | TRCN0000472220 | 0.37                | 0.09                  | 0                   |
| 101 | Neutral control | DPYS        |                           | TRCN0000472173                       | 0.25                     | 0.02                | 0                             | TRCN0000472173 | 0.38                     | 0.27                | 0                            | TRCN0000472173 | 0.42                | -0.06                 | 0                   |
| 102 | Neutral control | ENPP5       |                           | TRCN0000480733                       | 0.08                     | 0.26                | 0                             | TRCN0000480733 | 0.11                     | 0.20                | 0                            | TRCN0000480733 | 0.20                | -0.78                 | 0                   |
| 103 | Neutral control | EPT1        |                           | TRCN0000472043                       | 0.42                     | 0.06                | 0                             | TRCN0000472043 | 0.28                     | 0.06                | 0                            | TRCN0000472043 | 0.40                | 0.28                  | 0                   |
| 104 | Neutral control | FGL1        |                           | TRCN0000467977                       | 0.32                     | 0.20                | 0                             | TRCN0000467977 | 0.22                     | 0.17                | 0                            | TRCN0000467977 | 0.40                | 0.32                  | 0                   |
| 105 | Neutral control | GBP6        |                           | TRCN0000468591                       | 0.08                     | 0.35                | 0                             | TRCN0000468591 | 0.30                     | 0.34                | 0                            | TRCN0000468591 | 0.47                | 0.19                  | 0                   |
| 106 | Neutral control | GFAP        |                           | TRCN0000470974                       | 0.30                     | 0.19                | 0                             | TRCN0000470974 | 0.46                     | 0.19                | 0                            | TRCN0000470974 | 0.45                | 1.50                  | 0                   |
| 107 | Neutral control | GSTT2B      |                           | TRCN0000477749                       | 0.25                     | 0.04                | 0                             | TRCN0000477749 | 0.26                     | 0.37                | 0                            | TRCN0000477749 | 0.41                | -0.50                 | 0                   |
| 108 | Neutral control | HLA-B       |                           | TRCN0000466537                       | 0.31                     | 0.13                | 0                             | TRCN0000466537 | 0.47                     | 0.15                | 0                            | TRCN0000466537 | 0.31                | -0.76                 | 0                   |
| 109 | Neutral control | HSD3B1      |                           | TRCN0000467445                       | 0.10                     | 0.20                | 0                             | TRCN0000467445 | 0.12                     | 0.30                | 0                            | TRCN0000467445 | 0.37                | 1.16                  | 0                   |
| 110 | Neutral control | IL12B       |                           | TRCN0000470130                       | 0.31                     | 0.29                | 0                             | TRCN0000470130 | 0.25                     | 0.34                | 0                            | TRCN0000470130 | 0.57                | -0.06                 | 0                   |
| 111 | Neutral control | KCNJ13      |                           | TRCN0000471741                       | 0.05                     | 0.27                | 0                             | TRCN0000471741 | 0.41                     | 0.26                | 0                            | TRCN0000471741 | 0.25                | 0.39                  | 0                   |
| 112 | Neutral control | LYRM1       |                           | TRCN0000472126                       | 0.37                     | 0.14                | 0                             | TRCN0000472126 | 0.29                     | 0.11                | 0                            | TRCN0000472126 | 0.29                | -0.14                 | 0                   |
| 113 | Neutral control | MRPS5       |                           | TRCN0000468744                       | 0.15                     | 0.04                | 0                             | TRCN0000468744 | 0.11                     | 0.38                | 0                            | TRCN0000468744 | 0.45                | -2.00                 | 0                   |
| 114 | Neutral control | MRTO4       |                           | TRCN0000466401                       | 0.36                     | 0.31                | 0                             | TRCN0000466401 | 0.23                     | 0.28                | 0                            | TRCN0000466401 | 0.66                | 0.18                  | 0                   |
| 115 | Neutral control | NPIP5A      |                           | TRCN0000473627                       | 0.12                     | 0.46                | 0                             | TRCN0000473627 | 0.16                     | 0.35                | 0                            | TRCN0000473627 | 0.37                | 0.20                  | 0                   |
| 116 | Neutral control | RNF2        |                           | TRCN0000472910                       | 0.03                     | 0.01                | 0                             | TRCN0000472910 | 0.29                     | 0.31                | 0                            | TRCN0000472910 | 0.56                | 0.82                  | 0                   |
| 117 | Neutral control | SCO1        |                           | TRCN0000480160                       | 0.36                     | 0.09                | 0                             | TRCN0000480160 | 0.19                     | 0.43                | 0                            | TRCN0000480160 | 0.58                | 0.08                  | 0                   |

| #   | Category           | Gene symbol | Pathway | Genome-wide ORF screen: SK-N-BE(2)-C |                          |                     |                        | Genome-wide ORF screen: LAN-1 |                          |                     |                        | Validation ORF screen: LAN-1 CHP-212 |                     |                     | Validation screen hit |
|-----|--------------------|-------------|---------|--------------------------------------|--------------------------|---------------------|------------------------|-------------------------------|--------------------------|---------------------|------------------------|--------------------------------------|---------------------|---------------------|-----------------------|
|     |                    |             |         | Construct ID                         | z-score I-BET151 vs. ETP | z-score JQ1 vs. ETP | Genome-wide screen hit | Construct ID                  | z-score I-BET151 vs. ETP | z-score JQ1 vs. ETP | Genome-wide screen hit | Construct ID                         | z-score JQ1 vs. ETP | z-score JQ1 vs. ETP |                       |
| 118 | Neutral control    | SH3GLB1     |         | TRCN0000465766                       | 0.21                     | 0.44                | 0                      | TRCN0000465766                | 0.26                     | 0.14                | 0                      | TRCN0000465766                       | 0.15                | 0.33                | 0                     |
| 119 | Neutral control    | SHMT1       |         | TRCN0000480756                       | 0.22                     | 0.36                | 0                      | TRCN0000480756                | 0.31                     | 0.32                | 0                      | TRCN0000480756                       | 0.41                | 0.14                | 0                     |
| 120 | Neutral control    | SNRNP25     |         | TRCN0000478472                       | 0.26                     | 0.18                | 0                      | TRCN0000478472                | 0.25                     | 0.24                | 0                      | TRCN0000478472                       | 0.50                | 0.60                | 0                     |
| 121 | Neutral control    | SNUPN       |         | TRCN0000474119                       | 0.34                     | 0.22                | 0                      | TRCN0000474119                | 0.20                     | 0.07                | 0                      | TRCN0000474119                       | 0.06                | -0.25               | 0                     |
| 122 | Neutral control    | ST6GALNAC6  |         | TRCN0000473467                       | 0.15                     | 0.35                | 0                      | TRCN0000473467                | 0.36                     | 0.25                | 0                      | TRCN0000473467                       | 0.31                | -4.28               | 0                     |
| 123 | Neutral control    | STAC        |         | TRCN0000492333                       | 0.29                     | 0.28                | 0                      | TRCN0000492333                | 0.29                     | 0.24                | 0                      | TRCN0000492333                       | 0.47                | 0.72                | 0                     |
| 124 | Neutral control    | THBS3       |         | TRCN0000472509                       | 0.14                     | 0.17                | 0                      | TRCN0000472509                | 0.34                     | 0.12                | 0                      | TRCN0000472509                       | 0.33                | 0.30                | 0                     |
| 125 | Neutral control    | TMOD3       |         | TRCN0000470700                       | 0.18                     | 0.30                | 0                      | TRCN0000470700                | 0.32                     | 0.16                | 0                      | TRCN0000470700                       | 0.30                | -2.58               | 0                     |
| 126 | Neutral control    | TRH         |         | TRCN0000492070                       | 0.04                     | 0.11                | 0                      | TRCN0000492070                | 0.25                     | 0.32                | 0                      | TRCN0000492070                       | 0.45                | 0.06                | 0                     |
| 127 | Neutral control    | UFC1        |         | TRCN0000471317                       | 0.11                     | 0.10                | 0                      | TRCN0000471317                | 0.26                     | 0.36                | 0                      | TRCN0000471317                       | 0.36                | 0.06                | 0                     |
| 128 | Neutral control    | ZDHHC2      |         | TRCN0000491998                       | 0.42                     | 0.26                | 0                      | TRCN0000491998                | 0.28                     | 0.41                | 0                      | TRCN0000491998                       | 0.49                | -0.87               | 0                     |
| 129 | Neutral control    | ZSCAN21     |         | TRCN0000478659                       | 0.34                     | 0.28                | 0                      | TRCN0000478659                | 0.33                     | 0.12                | 0                      | TRCN0000478659                       | 0.37                | -1.09               | 0                     |
| 130 | Neutral control    | ASP         |         | TRCN0000469338                       | 0.01                     | 0.45                | 0                      | TRCN0000469338                | 0.26                     | 0.38                | 0                      | TRCN0000469338                       | 0.54                | -0.29               | 0                     |
| 131 | Neutral control    | CCDC47      |         | TRCN0000466188                       | 0.38                     | 0.06                | 0                      | TRCN0000466188                | 0.38                     | 0.07                | 0                      | TRCN0000466188                       | 0.40                | 0.76                | 0                     |
| 132 | Neutral control    | HIPK1       |         | TRCN0000472928                       | 0.42                     | 0.06                | 0                      | TRCN0000472928                | 0.26                     | 0.29                | 0                      | TRCN0000472928                       | 0.40                | 0.26                | 0                     |
| 133 | Neutral control    | PDCD10      |         | TRCN0000474286                       | 0.38                     | 0.07                | 0                      | TRCN0000474286                | 0.44                     | 0.15                | 0                      | TRCN0000474286                       | 0.21                | -2.92               | 0                     |
| 134 | Neg control        | BAD         |         | TRCN0000466830                       | -3.88                    | -3.65               | 0                      | TRCN0000466830                | -5.72                    | -5.31               | 0                      | TRCN0000466830                       | -5.23               | 0.12                | 0                     |
| 135 | Neg control        | CCER1       |         | TRCN0000473392                       | -3.71                    | -4.07               | 0                      | TRCN0000473392                | -5.72                    | -5.63               | 0                      | TRCN0000473392                       | -4.47               | 0.24                | 0                     |
| 136 | Neg control        | ELF2        |         | TRCN0000469930                       | -3.65                    | -3.74               | 0                      | TRCN0000469930                | -3.97                    | -4.35               | 0                      | TRCN0000469930                       | -2.20               | 0.19                | 0                     |
| 137 | Neg control        | IRX6        |         | TRCN0000478056                       | -3.16                    | -3.07               | 0                      | TRCN0000478056                | -4.82                    | -4.55               | 0                      | TRCN0000478056                       | -3.00               | 0.11                | 0                     |
| 138 | Neg control        | MITD1       |         | TRCN0000480522                       | -4.36                    | -4.15               | 0                      | TRCN0000480522                | -3.35                    | -2.93               | 0                      | TRCN0000480522                       | -2.76               | 0.29                | 0                     |
| 139 | Neg control        | PPARG       |         | TRCN0000488879                       | -2.73                    | -2.53               | 0                      | TRCN0000488879                | -3.22                    | -3.94               | 0                      | TRCN0000488879                       | -1.98               | -0.11               | 0                     |
| 140 | Neg control        | SPATA25     |         | TRCN0000481565                       | -4.40                    | -4.69               | 0                      | TRCN0000481565                | -5.37                    | -5.13               | 0                      | TRCN0000481565                       | -4.81               | 0.17                | 0                     |
| 141 | Neg control        | TCEB3B      |         | TRCN0000467856                       | -4.30                    | -4.09               | 0                      | TRCN0000467856                | -5.64                    | -5.49               | 0                      | TRCN0000467856                       | -5.62               | 0.25                | 0                     |
| 142 | Neg control        | TFAP2A      |         | TRCN0000481607                       | -3.30                    | -3.65               | 0                      | TRCN0000481607                | -3.87                    | -3.89               | 0                      | TRCN0000481607                       | -2.57               | 0.25                | 0                     |
| 143 | Neg control        | THAP1       |         | TRCN0000480905                       | -2.76                    | -3.69               | 0                      | TRCN0000480905                | -3.70                    | -4.33               | 0                      | TRCN0000480905                       | -2.21               | -3.31               | 0                     |
| 144 | External control   | BFP         |         | BRDN0000559460                       | na                       | na                  | 0                      | BRDN0000559460                | na                       | na                  | 0                      | BRDN0000559460                       | 0.18                | -0.15               | 0                     |
| 145 | External control   | LacZ        |         | BRDN0000559461                       | na                       | na                  | 0                      | BRDN0000559461                | na                       | na                  | 0                      | BRDN0000559461                       | -1.37               | 1.20                | 0                     |
| 146 | External control   | HcRed       |         | BRDN0000559463                       | na                       | na                  | 0                      | BRDN0000559463                | na                       | na                  | 0                      | BRDN0000559463                       | 0.20                | 0.03                | 0                     |
| 147 | External control   | LUCIFERASE  |         | BRDN0000559468                       | na                       | na                  | 0                      | BRDN0000559468                | na                       | na                  | 0                      | BRDN0000559468                       | -1.47               | -0.48               | 0                     |
| 148 | External control   | eGFP        |         | BRDN0000559466                       | na                       | na                  | 0                      | BRDN0000559466                | na                       | na                  | 0                      | BRDN0000559466                       | 0.49                | 0.28                | 0                     |
| 149 | External candidate | cMYC        |         | BRDN0000553495                       | na                       | na                  | 0                      | BRDN0000553495                | na                       | na                  | 0                      | BRDN0000553495                       | -0.79               | 0.13                | 0                     |
| 150 | External candidate | MYCN        |         | BRDN0001487020                       | na                       | na                  | 0                      | BRDN0001487020                | na                       | na                  | 0                      | BRDN0001487020                       | -1.28               | 0.19                | 0                     |

Table S4, Related to Figure 1. Results of the CRISPR-Cas9 BET1 rescue screen in SK-N-BE(2)-C cells and LAN-1 cells.

SK-N-BE(2)-C

| #  | Construct ID   | Gene<br>[# sgRNA hits /<br>total # sgRNAs] | Pathway    | Hit<br>specificity        | z-score<br>I-BET151<br>vs. ETP | z-score<br>JQ1 vs.<br>ETP | Av. z-scores<br>I-BET151 and<br>JQ1 vs. ETP |
|----|----------------|--------------------------------------------|------------|---------------------------|--------------------------------|---------------------------|---------------------------------------------|
| 1  | BRDN0000938810 | RASA2 [4/4]                                |            | SK-N-BE(2)-C specific hit | 12.70                          | 5.60                      | 9.15                                        |
| 2  | BRDN0000938813 | RASA2 [4/4]                                |            | SK-N-BE(2)-C specific hit | 11.30                          | 5.60                      | 8.45                                        |
| 3  | BRDN0000938811 | RASA2 [4/4]                                |            | SK-N-BE(2)-C specific hit | 11.00                          | 4.90                      | 7.95                                        |
| 4  | BRDN0000882124 | CSK [4/4]                                  |            | SK-N-BE(2)-C specific hit | 11.10                          | 4.70                      | 7.90                                        |
| 5  | BRDN0000938812 | RASA2 [4/4]                                | PI3K/AKT   | SK-N-BE(2)-C specific hit | 10.00                          | 3.70                      | 6.85                                        |
| 6  | BRDN0000882126 | CSK [4/4]                                  |            | SK-N-BE(2)-C specific hit | 9.10                           | 3.60                      | 6.35                                        |
| 7  | BRDN0000914147 | LZTR1 [4/4]                                |            | SK-N-BE(2)-C specific hit | 8.50                           | 3.70                      | 6.10                                        |
| 8  | BRDN0000957757 | TMEM127 [3/4]                              | PI3K/AKT   | SK-N-BE(2)-C specific hit | 7.80                           | 4.20                      | 6.00                                        |
| 9  | BRDN0000932280 | PLCG1 [4/4]                                | PI3K/AKT   | SK-N-BE(2)-C specific hit | 7.50                           | 4.20                      | 5.85                                        |
| 10 | BRDN0000957754 | TMEM127 [3/4]                              | PI3K/AKT   | SK-N-BE(2)-C specific hit | 8.10                           | 3.60                      | 5.85                                        |
| 11 | BRDN0000932278 | PLCG1 [4/4]                                | PI3K/AKT   | SK-N-BE(2)-C specific hit | 7.10                           | 4.30                      | 5.70                                        |
| 12 | BRDN0000914146 | LZTR1 [4/4]                                |            | SK-N-BE(2)-C specific hit | 7.70                           | 3.30                      | 5.50                                        |
| 13 | BRDN0000957755 | TMEM127 [3/4]                              | PI3K/AKT   | SK-N-BE(2)-C specific hit | 6.00                           | 4.10                      | 5.05                                        |
| 14 | BRDN0000882125 | CSK [4/4]                                  |            | SK-N-BE(2)-C specific hit | 6.00                           | 3.90                      | 4.95                                        |
| 15 | BRDN0000914150 | LZTR1 [4/4]                                |            | SK-N-BE(2)-C specific hit | 6.60                           | 3.30                      | 4.95                                        |
| 16 | BRDN0000936813 | PTEN [4/4]                                 | PI3K/AKT   | Core hit                  | 5.40                           | 3.90                      | 4.65                                        |
| 17 | BRDN0000867256 | ATP6V1B1 [1/4]                             |            | SK-N-BE(2)-C specific hit | 5.30                           | 4.00                      | 4.65                                        |
| 18 | BRDN0000937083 | PTPN1 [3/4]                                |            | SK-N-BE(2)-C specific hit | 6.00                           | 3.20                      | 4.60                                        |
| 19 | BRDN0000936812 | PTEN [4/4]                                 | PI3K/AKT   | Core hit                  | 5.50                           | 3.60                      | 4.55                                        |
| 20 | BRDN0000885353 | DET1 [2/4]                                 |            | SK-N-BE(2)-C specific hit | 5.50                           | 3.50                      | 4.50                                        |
| 21 | BRDN0000885352 | DET1 [2/4]                                 |            | SK-N-BE(2)-C specific hit | 5.70                           | 3.10                      | 4.40                                        |
| 22 | BRDN0000932279 | PLCG1 [4/4]                                | PI3K/AKT   | SK-N-BE(2)-C specific hit | 5.80                           | 2.90                      | 4.35                                        |
| 23 | BRDN0000952872 | STK11 [2/4]                                |            | SK-N-BE(2)-C specific hit | 6.00                           | 2.70                      | 4.35                                        |
| 24 | BRDN0000936815 | PTEN [4/4]                                 | PI3K/AKT   | Core hit                  | 5.20                           | 3.40                      | 4.30                                        |
| 25 | BRDN0000914151 | LZTR1 [4/4]                                |            | SK-N-BE(2)-C specific hit | 6.00                           | 2.60                      | 4.30                                        |
| 26 | BRDN0000937084 | PTPN1 [3/4]                                |            | SK-N-BE(2)-C specific hit | 5.70                           | 2.60                      | 4.15                                        |
| 27 | BRDN0000940114 | RFWD2 [1/4]                                |            | SK-N-BE(2)-C specific hit | 5.30                           | 2.90                      | 4.10                                        |
| 28 | BRDN0000957058 | TIPRL [1/4]                                |            | SK-N-BE(2)-C specific hit | 3.90                           | 4.20                      | 4.05                                        |
| 29 | BRDN0000882127 | CSK [4/4]                                  |            | SK-N-BE(2)-C specific hit | 4.30                           | 3.50                      | 3.90                                        |
| 30 | BRDN0000878824 | CIC [1/4]                                  |            | SK-N-BE(2)-C specific hit | 4.80                           | 2.80                      | 3.80                                        |
| 31 | BRDN0000932281 | PLCG1 [4/4]                                | PI3K/AKT   | SK-N-BE(2)-C specific hit | 3.60                           | 3.50                      | 3.55                                        |
| 32 | BRDN0000868117 | BAX [2/4]                                  | Apoptosis  | Core hit                  | 4.10                           | 2.90                      | 3.50                                        |
| 33 | BRDN0000894396 | FKBP1 [1/4]                                | Cell cycle | SK-N-BE(2)-C specific hit | 4.10                           | 2.60                      | 3.35                                        |
| 34 | BRDN0000963126 | UBE2N [2/4]                                |            | SK-N-BE(2)-C specific hit | 3.90                           | 2.80                      | 3.35                                        |
| 35 | BRDN0000874213 | CSLB [1/4]                                 |            | SK-N-BE(2)-C specific hit | 3.90                           | 2.60                      | 3.25                                        |
| 36 | BRDN0000952871 | STK11 [2/4]                                |            | SK-N-BE(2)-C specific hit | 3.80                           | 2.70                      | 3.25                                        |
| 37 | BRDN0000936814 | PTEN [4/4]                                 | PI3K/AKT   | Core hit                  | 3.80                           | 2.60                      | 3.20                                        |
| 38 | BRDN0000868114 | BAX [2/4]                                  | Apoptosis  | Core hit                  | 3.00                           | 2.90                      | 2.95                                        |
| 39 | BRDN0000937085 | PTPN1 [3/4]                                |            | SK-N-BE(2)-C specific hit | 2.90                           | 2.80                      | 2.85                                        |
| 40 | BRDN0000949460 | SMEK1 [1/4]                                |            | SK-N-BE(2)-C specific hit | 2.90                           | 2.50                      | 2.70                                        |
| 41 | BRDN0000963127 | UBE2N [2/4]                                |            | SK-N-BE(2)-C specific hit | 2.90                           | 2.50                      | 2.70                                        |
| 42 | BRDN0000914774 | MAP1LC3A [1/4]                             |            | SK-N-BE(2)-C specific hit | 2.60                           | 2.50                      | 2.55                                        |

LAN-1

| #  | Construct ID   | Gene<br>[# sgRNA hits /<br>total # sgRNAs] | Pathway   | Hit<br>specificity | z-score<br>I-BET151<br>vs. ETP | z-score<br>JQ1 vs.<br>ETP | Av. z-scores<br>I-BET151 and<br>JQ1 vs. ETP |
|----|----------------|--------------------------------------------|-----------|--------------------|--------------------------------|---------------------------|---------------------------------------------|
| 1  | BRDN0000876725 | CDH2 [4/4]                                 |           | LAN-1 specific hit | 8.65                           | 7.81                      | 8.23                                        |
| 2  | BRDN0000876727 | CDH2 [4/4]                                 |           | LAN-1 specific hit | 8.18                           | 7.18                      | 7.68                                        |
| 3  | BRDN0000876726 | CDH2 [4/4]                                 |           | LAN-1 specific hit | 8.19                           | 6.99                      | 7.59                                        |
| 4  | BRDN0000876724 | CDH2 [4/4]                                 |           | LAN-1 specific hit | 7.89                           | 6.80                      | 7.34                                        |
| 5  | BRDN0000932840 | PMAIP1 [3/4]                               | Apoptosis | LAN-1 specific hit | 5.46                           | 6.91                      | 6.18                                        |
| 6  | BRDN0000932841 | PMAIP1 [3/4]                               | Apoptosis | LAN-1 specific hit | 5.12                           | 6.50                      | 5.81                                        |
| 7  | BRDN0000971194 | ZNF787 [4/4]                               |           | LAN-1 specific hit | 4.99                           | 5.42                      | 5.20                                        |
| 8  | BRDN0000884867 | DEAF1 [3/4]                                |           | LAN-1 specific hit | 4.52                           | 5.74                      | 5.13                                        |
| 9  | BRDN0000932842 | PMAIP1 [3/4]                               | Apoptosis | LAN-1 specific hit | 4.37                           | 5.86                      | 5.11                                        |
| 10 | BRDN0000868117 | BAX [4/4]                                  | Apoptosis | Core hit           | 4.72                           | 5.50                      | 5.11                                        |
| 11 | BRDN0000929711 | PCSK7 [3/4]                                |           | LAN-1 specific hit | 4.11                           | 5.49                      | 4.80                                        |
| 12 | BRDN0000884866 | DEAF1 [3/4]                                |           | LAN-1 specific hit | 4.28                           | 5.31                      | 4.80                                        |
| 13 | BRDN0000929714 | PCSK7 [3/4]                                |           | LAN-1 specific hit | 4.52                           | 5.03                      | 4.77                                        |
| 14 | BRDN0000971197 | ZNF787 [4/4]                               |           | LAN-1 specific hit | 4.47                           | 4.85                      | 4.66                                        |
| 15 | BRDN0000937766 | R3HDM1 [3/4]                               |           | LAN-1 specific hit | 4.03                           | 5.22                      | 4.62                                        |
| 16 | BRDN0000954325 | TADA2B [1/4]                               |           | LAN-1 specific hit | 3.51                           | 5.59                      | 4.55                                        |
| 17 | BRDN0000968520 | ZMYM4 [1/4]                                |           | LAN-1 specific hit | 4.31                           | 4.71                      | 4.51                                        |
| 18 | BRDN0000929715 | PCSK7 [3/4]                                |           | LAN-1 specific hit | 4.00                           | 4.97                      | 4.48                                        |
| 19 | BRDN0000868114 | BAX [4/4]                                  | Apoptosis | Core hit           | 3.85                           | 5.00                      | 4.43                                        |
| 20 | BRDN0000868116 | BAX [4/4]                                  | Apoptosis | Core hit           | 3.90                           | 4.92                      | 4.41                                        |
| 21 | BRDN0000868115 | BAX [4/4]                                  | Apoptosis | Core hit           | 3.82                           | 4.92                      | 4.37                                        |
| 22 | BRDN0000884868 | DEAF1 [3/4]                                |           | LAN-1 specific hit | 3.50                           | 4.60                      | 4.05                                        |
| 23 | BRDN0000936813 | PTEN [2/4]                                 | PI3K/AKT  | Core hit           | 4.68                           | 3.30                      | 3.99                                        |
| 24 | BRDN0000936815 | PTEN [2/4]                                 | PI3K/AKT  | Core hit           | 4.77                           | 2.94                      | 3.85                                        |
| 25 | BRDN0000919129 | MTCH2 [1/4]                                |           | LAN-1 specific hit | 3.46                           | 4.20                      | 3.83                                        |
| 26 | BRDN0000882743 | CTNND1 [3/4]                               |           | LAN-1 specific hit | 3.59                           | 4.06                      | 3.82                                        |



|    |                |               |           |                    |      |      |      |
|----|----------------|---------------|-----------|--------------------|------|------|------|
| 27 | BRDN0000971195 | ZNF787 [4/4]  |           | LAN-1 specific hit | 3.58 | 3.74 | 3.66 |
| 28 | BRDN0000937768 | R3HDM1 [3/4]  |           | LAN-1 specific hit | 2.75 | 4.14 | 3.45 |
| 29 | BRDN0000882745 | CTNND1 [3/4]  |           | LAN-1 specific hit | 3.73 | 3.13 | 3.43 |
| 30 | BRDN0000868021 | BAK1 [1/4]    | Apoptosis | LAN-1 specific hit | 3.40 | 3.32 | 3.36 |
| 31 | BRDN0000971196 | ZNF787 [4/4]  |           | LAN-1 specific hit | 3.16 | 3.54 | 3.35 |
| 32 | BRDN0000877991 | CFL1 [3/4]    |           | LAN-1 specific hit | 3.33 | 3.35 | 3.34 |
| 33 | BRDN0000938534 | RALGAPB [1/4] | PI3K/AKT  | LAN-1 specific hit | 4.02 | 2.61 | 3.31 |
| 34 | BRDN0000934695 | PPTC7 [1/4]   |           | LAN-1 specific hit | 3.31 | 3.31 | 3.31 |
| 35 | BRDN0000877992 | CFL1 [3/4]    |           | LAN-1 specific hit | 3.35 | 3.20 | 3.28 |
| 36 | BRDN0000953128 | STRAP [2/4]   |           | LAN-1 specific hit | 2.97 | 3.55 | 3.26 |
| 37 | BRDN0000937726 | QSER1 [2/4]   |           | LAN-1 specific hit | 3.01 | 3.49 | 3.25 |
| 38 | BRDN0000877993 | CFL1 [3/4]    |           | LAN-1 specific hit | 3.08 | 3.41 | 3.24 |
| 39 | BRDN0000917316 | MLLT10 [2/4]  |           | LAN-1 specific hit | 3.26 | 3.22 | 3.24 |
| 40 | BRDN0000882742 | CTNND1 [3/4]  |           | LAN-1 specific hit | 2.99 | 3.47 | 3.23 |
| 41 | BRDN0000937767 | R3HDM1 [3/4]  |           | LAN-1 specific hit | 2.56 | 3.86 | 3.21 |
| 42 | BRDN0000882043 | CSDE1 [1/4]   |           | LAN-1 specific hit | 2.64 | 3.55 | 3.10 |
| 43 | BRDN0000953129 | STRAP [2/4]   |           | LAN-1 specific hit | 2.50 | 3.61 | 3.05 |
| 44 | BRDN0000963317 | UBP1 [1/4]    |           | LAN-1 specific hit | 2.95 | 3.04 | 3.00 |
| 45 | BRDN0000868367 | BCL2L11 [1/4] | Apoptosis | LAN-1 specific hit | 3.05 | 2.92 | 2.98 |
| 46 | BRDN0000882702 | CTNNA1 [1/4]  |           | LAN-1 specific hit | 2.94 | 2.98 | 2.96 |
| 47 | BRDN0000882988 | CUL5 [1/4]    |           | LAN-1 specific hit | 3.05 | 2.80 | 2.92 |
| 48 | BRDN0000877234 | CDYL [1/4]    |           | LAN-1 specific hit | 3.14 | 2.67 | 2.91 |
| 49 | BRDN0000952139 | SRSF6 [1/4]   |           | LAN-1 specific hit | 2.60 | 3.18 | 2.89 |
| 50 | BRDN0000878236 | CHD7 [1/4]    |           | LAN-1 specific hit | 2.92 | 2.80 | 2.86 |
| 51 | BRDN0000865621 | ARIH2 [1/4]   |           | LAN-1 specific hit | 3.18 | 2.53 | 2.86 |
| 52 | BRDN0000937727 | QSER1 [2/4]   |           | LAN-1 specific hit | 2.67 | 3.00 | 2.83 |
| 53 | BRDN0000963241 | UBE4A [2/4]   |           | LAN-1 specific hit | 2.87 | 2.61 | 2.74 |
| 54 | BRDN0000917314 | MLLT10 [2/4]  |           | LAN-1 specific hit | 2.65 | 2.72 | 2.69 |
| 55 | BRDN0000963238 | UBE4A [2/4]   |           | LAN-1 specific hit | 2.51 | 2.79 | 2.65 |
| 56 | BRDN0000922481 | NKIRAS2 [1/4] |           | LAN-1 specific hit | 2.56 | 2.50 | 2.53 |
| 57 | BRDN0000866033 | ARRDC3 [1/4]  |           | LAN-1 specific hit | 2.52 | 2.53 | 2.53 |

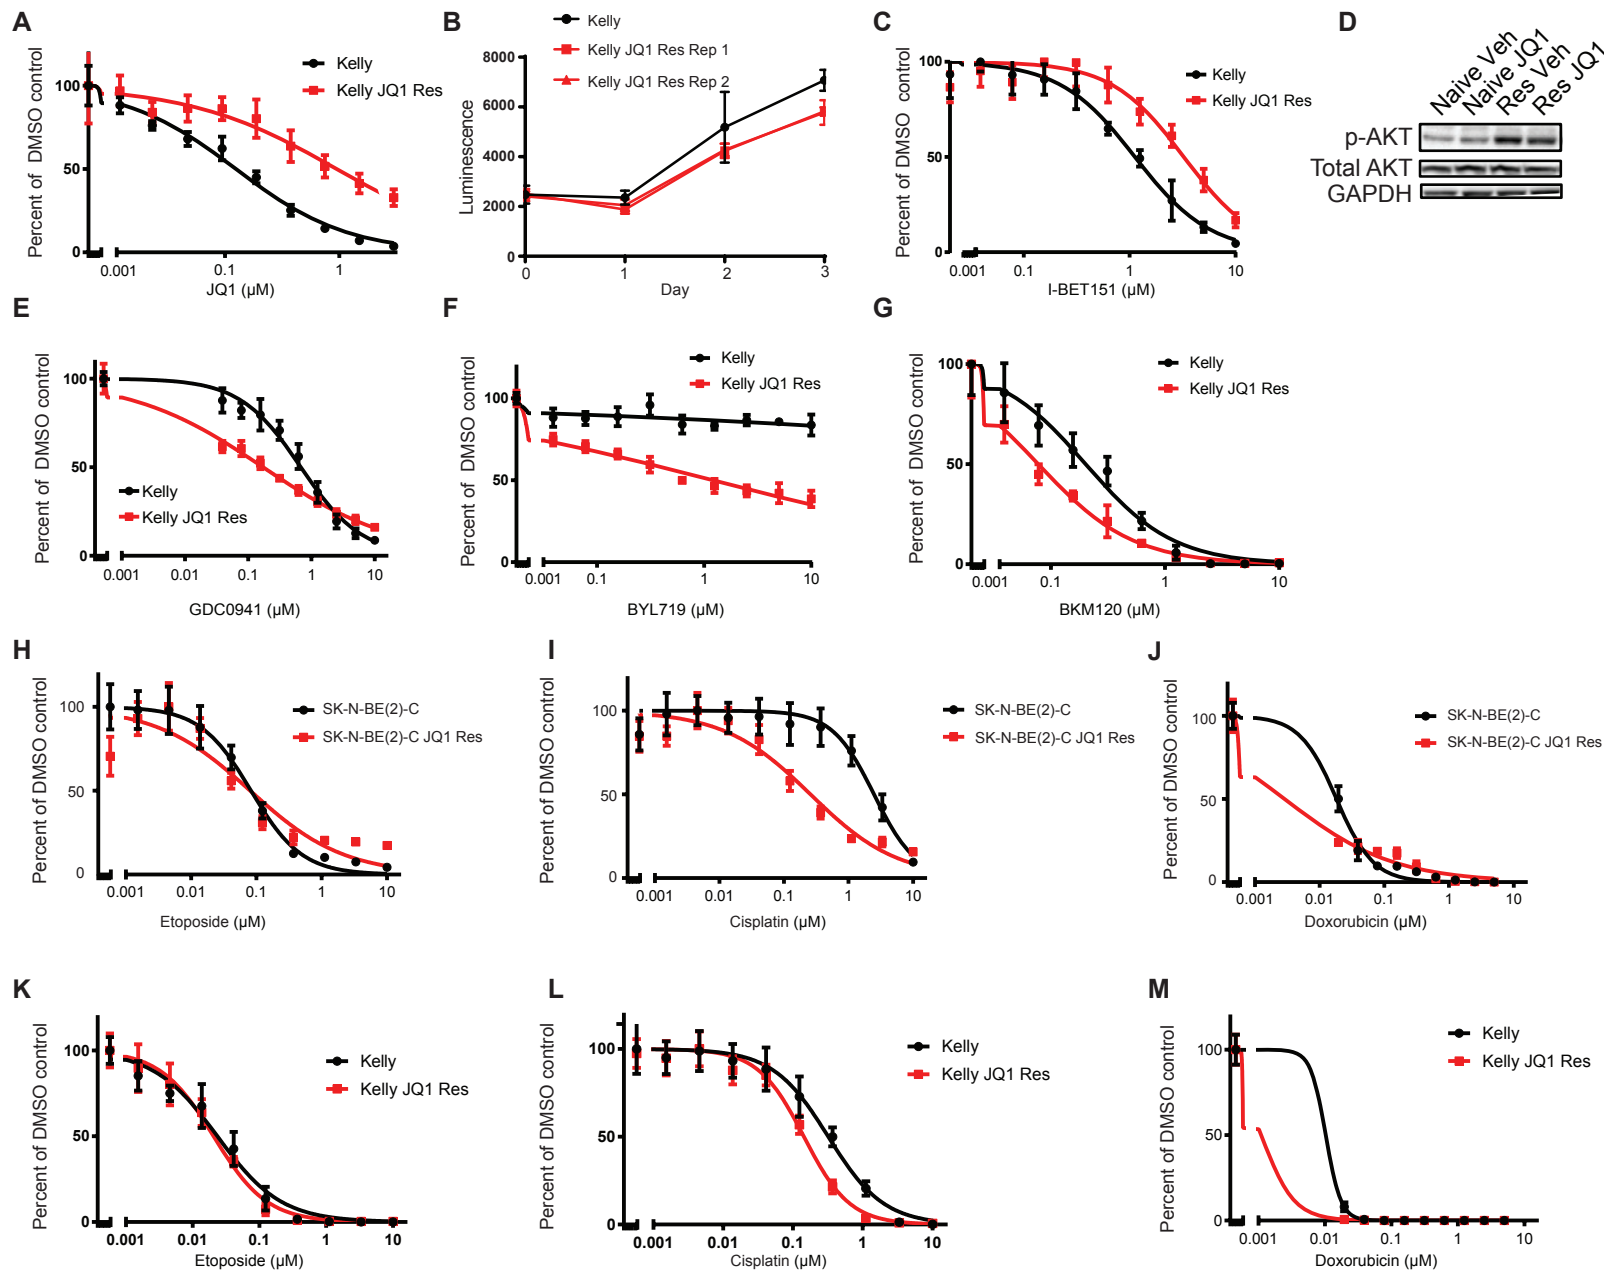

**Figure S2, Related to Figure 2: Characterization of cells with acquired resistance to JQ1.** **A.** Viability analysis with JQ1 treatment. **B.** Absolute growth rates of Kelly naive cells treated with vehicle control and two replicates of JQ1 resistant cells treated with 1  $\mu\text{M}$  JQ1. **C.** Viability analysis of IBET-151 treatment. **D.** Western blot showing downstream effectors of PI3K signaling in Kelly naive and JQ1 resistant cells. Viability analysis of **E.** GDC0941 **F.** BYL719 **G.** BKM120 and indicated chemotherapeutic drugs in **H-J.** SK-N-BE(2)-C and K-M. Kelly naive and JQ1 resistant cells.

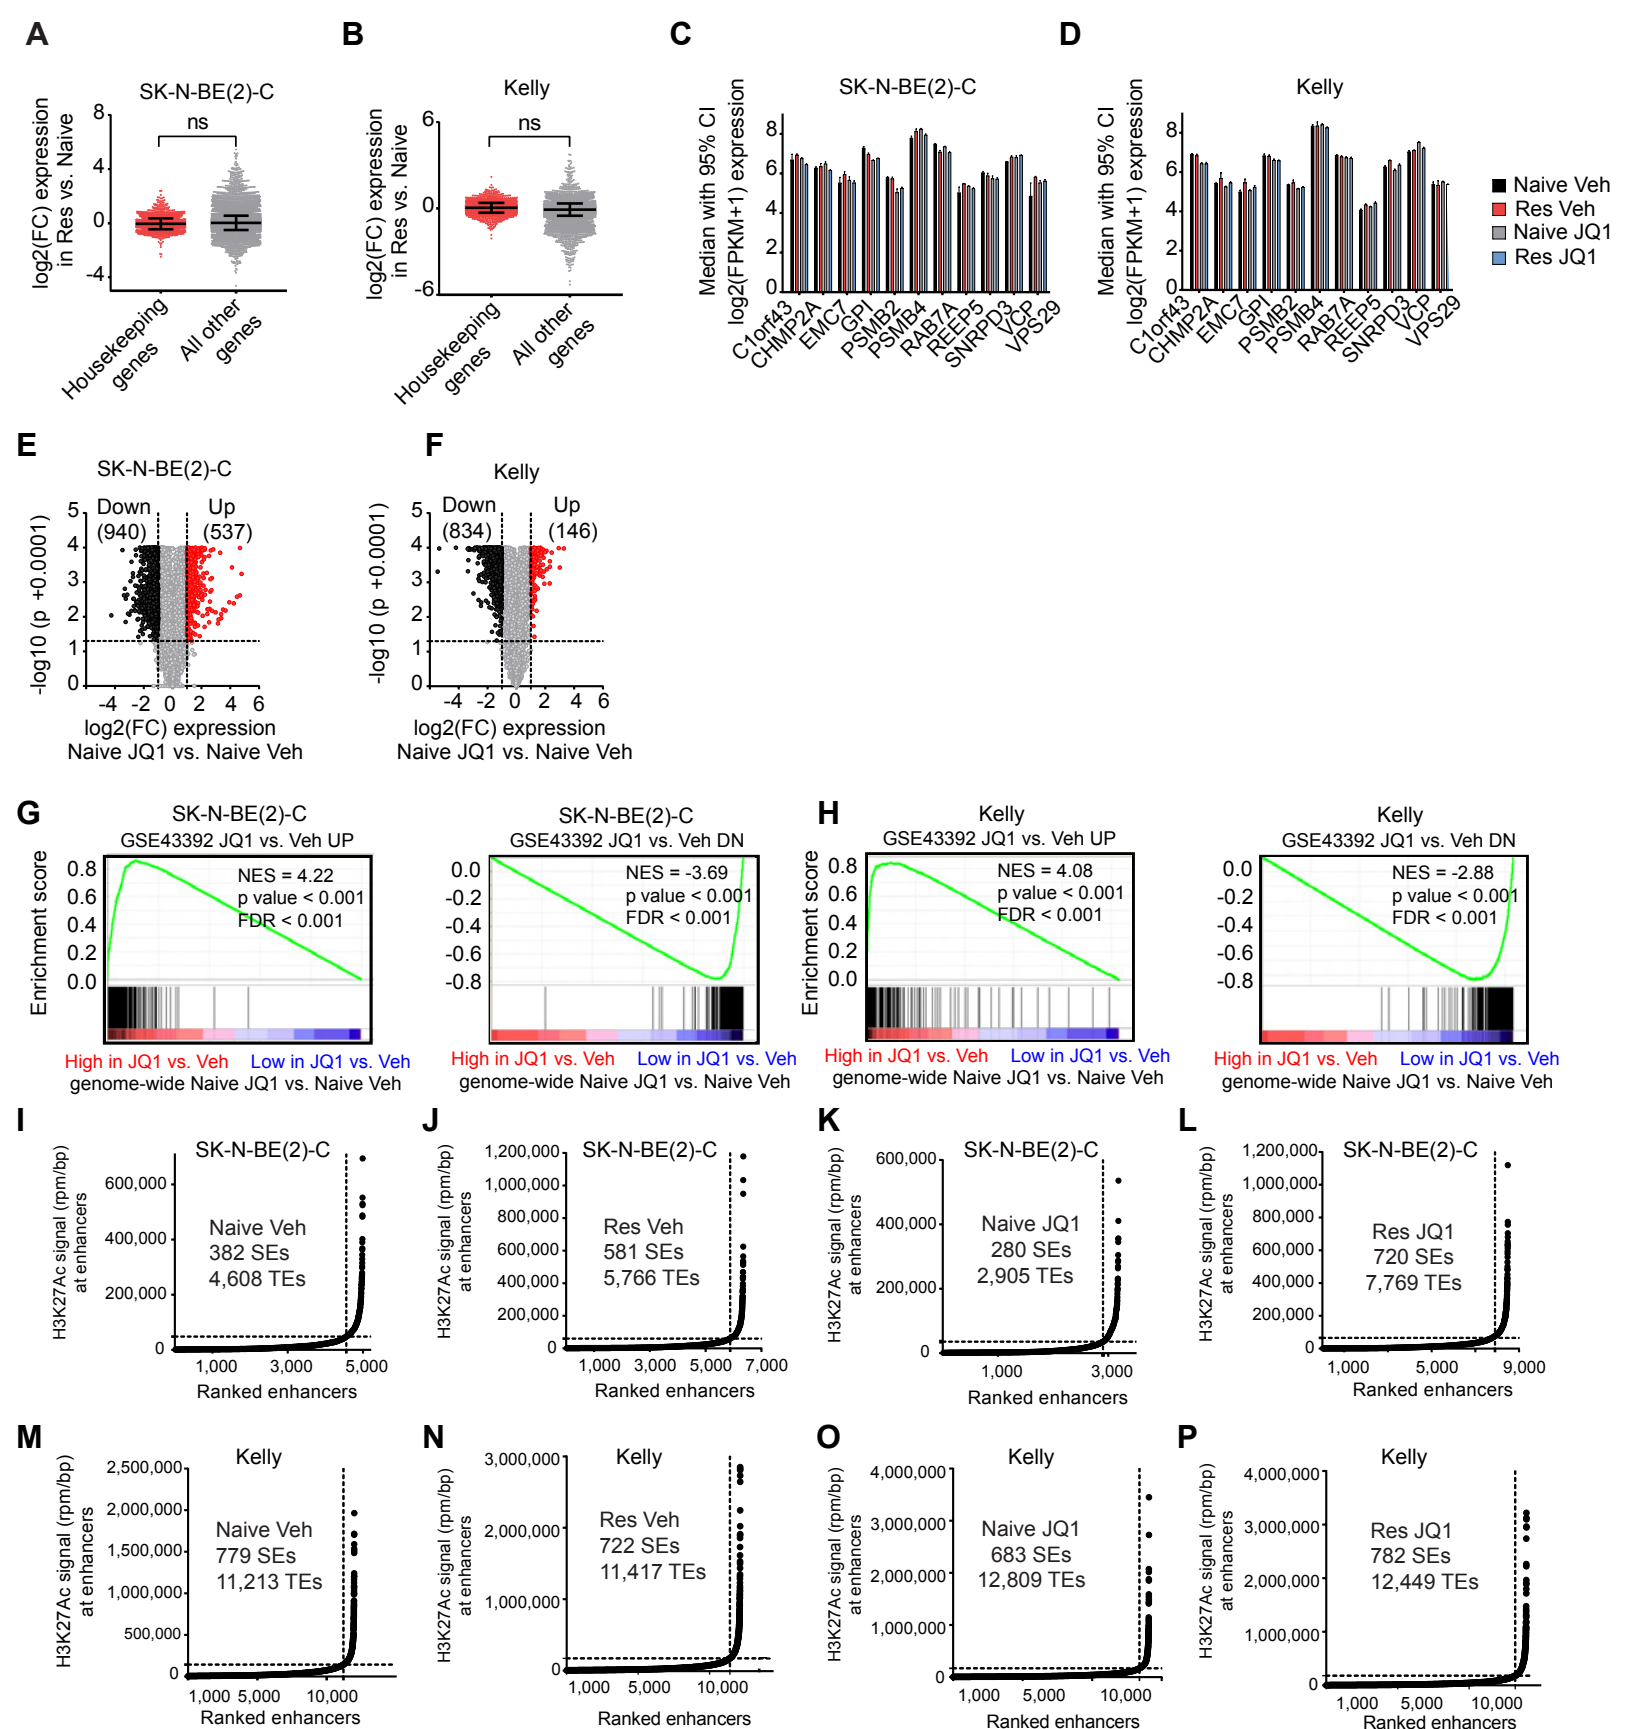

**Figure S3, Related to Figure 3: Differential gene expression profiling of JQ1 naïve and JQ1 resistant cells.**  $\log_2(\text{FC})$  gene expression for the collection of 3,804 human housekeeping genes vs. all other hg19 RefSeq genes across RNA-seq samples shown in Figure 3A and B in **A**. SK-N-BE(2)-C and **B**. Kelly cells. Difference in expression is estimated based on unpaired non-parametric t-test with Welch correction. ns= not significant.  $\log_2(\text{FPKM}+1)$  expression in JQ1 resistant vs. naïve SK-N-BE(2)-C cells for a core subset of housekeeping genes in **C**. SK-N-BE(2)-C and **D**. Kelly cells. Volcano plots highlighting the genes differentially expressed in JQ1 treated vs. untreated **E**. SK-N-BE(2)-C and **F**. Kelly naïve cells. The number of differentially upregulated and downregulated genes in resistant vs. naïve cells are shown in parentheses. GSEA demonstrating enrichment of genes upregulated by JQ1 vs. DMSO in the published microarray data GSE43392 among the genes upregulated by JQ1 treatment in naïve **G**, left: SK-N-BE(2)-C and **H**, left: Kelly cells. GSEA demonstrating enrichment of genes downregulated by JQ1 vs. DMSO in the published microarray data GSE43392 among the genes downregulated by JQ1 treatment in naïve **G**, right: SK-N-BE(2)-C and **H**, right: Kelly cells. Ranked plots of H3K27Ac enhancers in SK-N-BE(2)-C naïve cells treated with vehicle (**I**), JQ1 resistant cells treated with vehicle (**J**), naïve cells treated with JQ1 (**K**), and JQ1 resistant cells treated with JQ1 (**L**). Ranked plots of H3K27Ac enhancers in Kelly naïve cells treated with vehicle (**M**), JQ1 resistant cells treated with vehicle (**N**), naïve cells treated with JQ1 (**O**), and JQ1 resistant cells treated with JQ1 (**P**). Enhancers are defined as 12.5 kb stitched regions of H3K27Ac binding not contained in promoters (TSS +/- 2 kb). Cutoffs for discriminating typical from super-enhancers are shown as dashed gray lines. Enhancers are ranked by increasing reads per million mapped reads per base pair (rmp/bp) H3K27Ac binding signal.

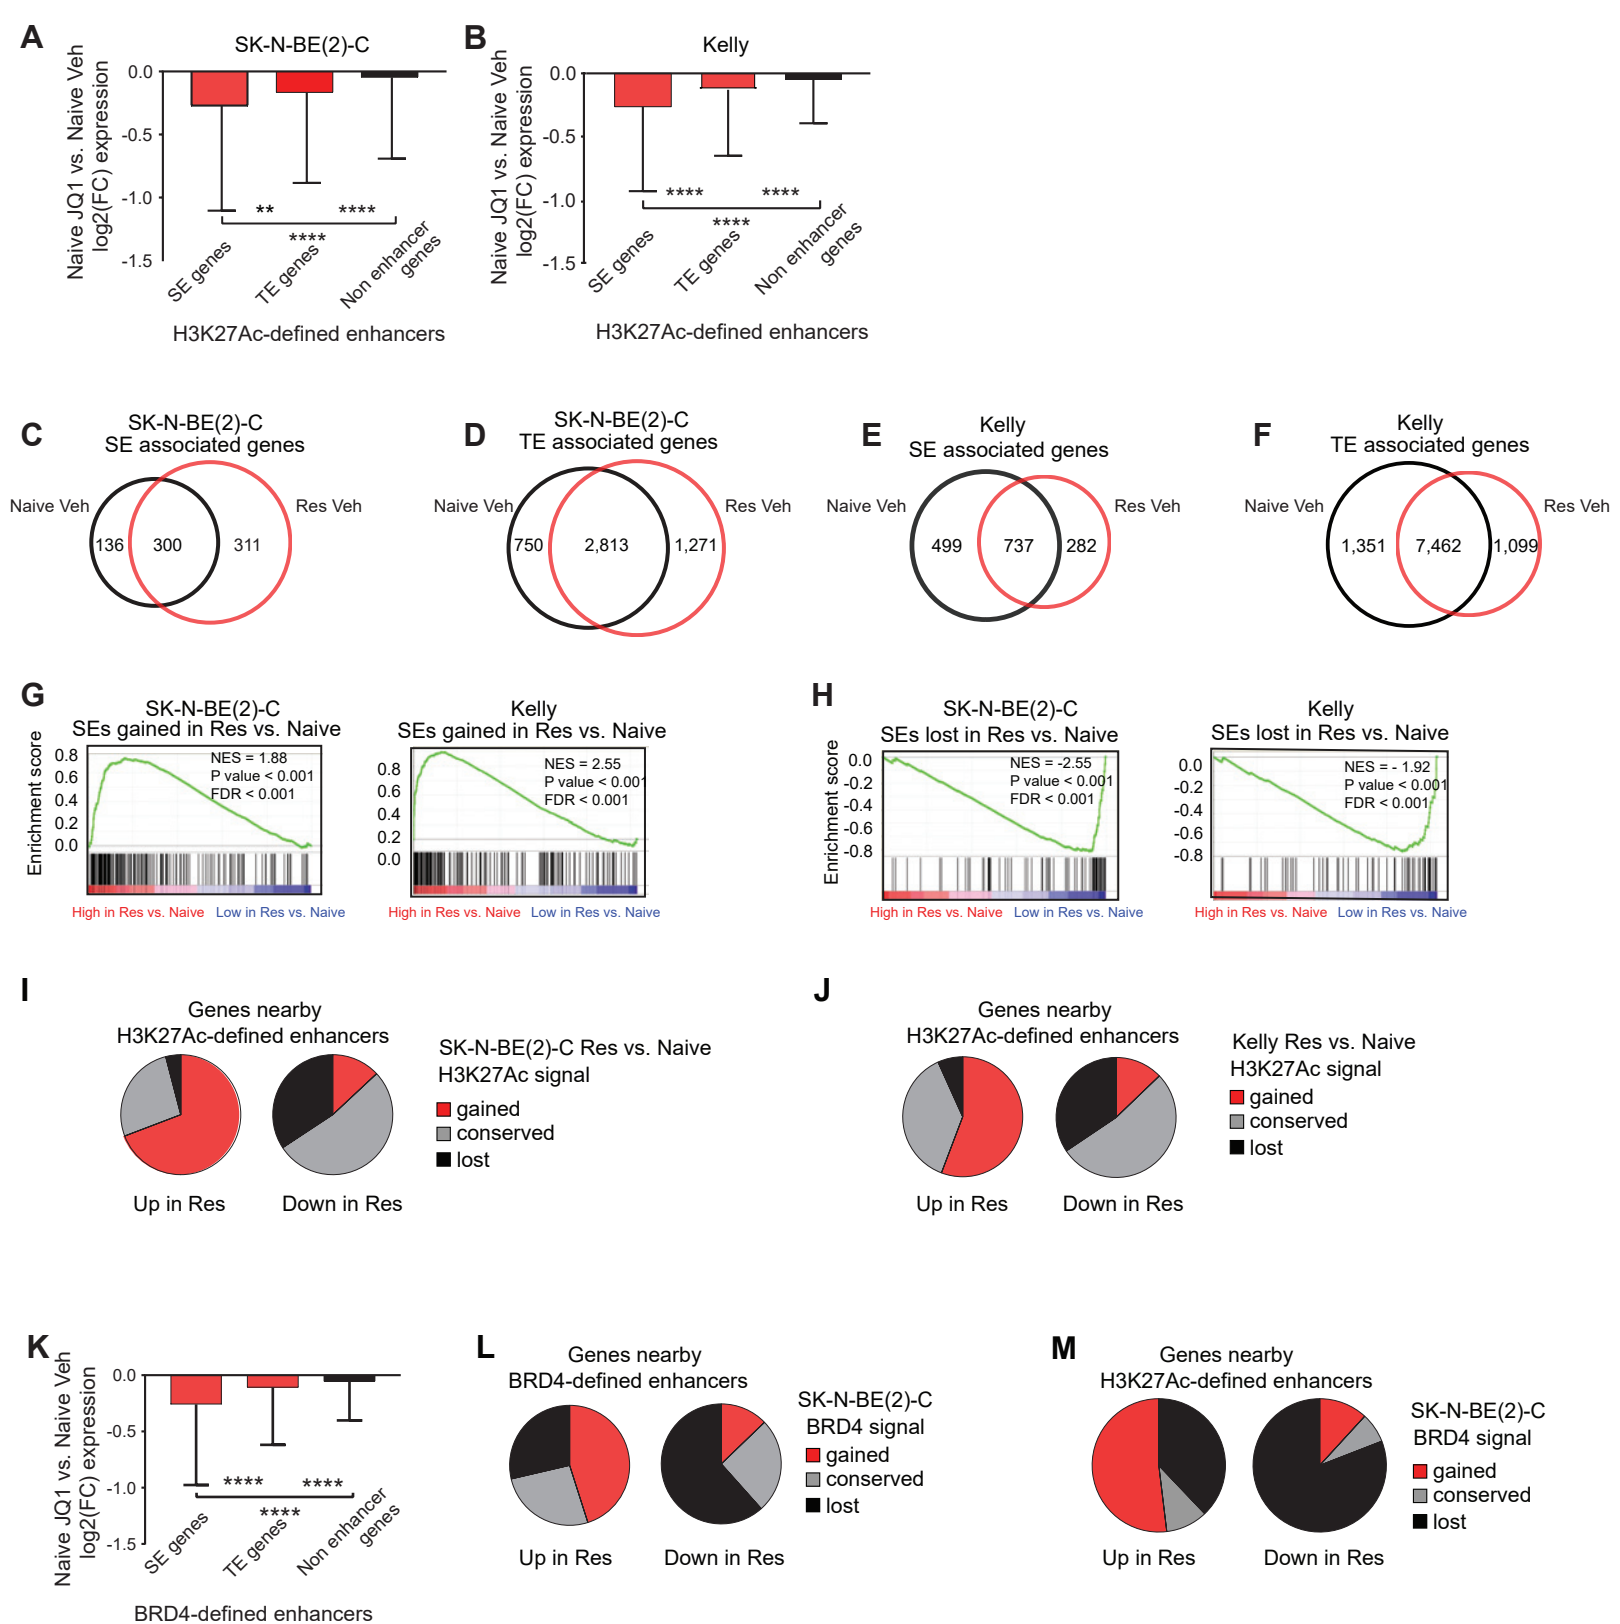

**Figure S4, Related to Figure 3: Differential enhancer remodeling in JQ1 resistant cells is associated with transcriptional changes observed in the resistant state.** Bar plots presenting the  $\log_2(\text{FC})$  in gene expression for JQ1 vs. vehicle treatment among the genes associated with SEs (red), TEs (red), and the genes not associated to enhancers (black) defined by H3K27Ac signal in **A**. SK-N-BE(2)-C and **B**. Kelly cells. SE and TE associated genes are more significantly downregulated by JQ1 treatment (\*\* p value < 0.01, \*\*\*\* p value < 0.0001, un-paired two sample Student t-test with Welch correction). Venn diagrams showing the overlap between the genes associated with **C**. SEs and **D**. TEs in the resistant and naive state for SK-N-BE(2)-C cells. Venn diagrams showing the overlap between the genes associated with **E**. SEs and **F**. TEs in the resistant and naive state for Kelly cells. **G**. Gene set enrichment plot for genes which gain a SE in resistance enriched for genes which are upregulated in resistance in left: SK-N-BE(2)-C and right: Kelly cells. **H**. Gene set enrichment plot for genes which have lost a SE in resistance enriched for genes which are downregulated in resistance in left: SK-N-BE(2)-C and right: Kelly cells. Pie charts showing the percentages of genes associated with gained, conserved and lost H3K27Ac signal in enhancers among the genes nearby H3K27Ac-defined enhancers which are transcriptionally upregulated and downregulated in **I**. SK-N-BE(2)-C and **J**. Kelly resistant vs. naive cells. **K**. Bar plots presenting the  $\log_2(\text{FC})$  in gene expression for JQ1 vs. vehicle treatment in naive SK-N-BE(2)-C cells among the genes associated with BRD4 SEs (red), BRD4 TEs (red), and the genes not associated to BRD4-defined enhancers (black). BRD4 SE and BRD4 TE associated genes are more significantly downregulated by JQ1 treatment (\*\* p value < 0.01, \*\*\*\* p value < 0.0001, un-paired two sample Student t-test with Welch correction). **L**. Pie charts showing the percentages of genes with gained, conserved and lost BRD4 signal in enhancers among upregulated and downregulated genes which can be assigned to nearby BRD4-defined enhancers in resistant vs. naive SK-N-BE(2)-C cells. **M**. Pie charts showing the percentages of genes with gained, conserved and lost BRD4 signal in enhancers among upregulated and downregulated genes which can be assigned to nearby H3K27Ac-defined enhancers in resistant vs. naive SK-N-BE(2)-C cells.

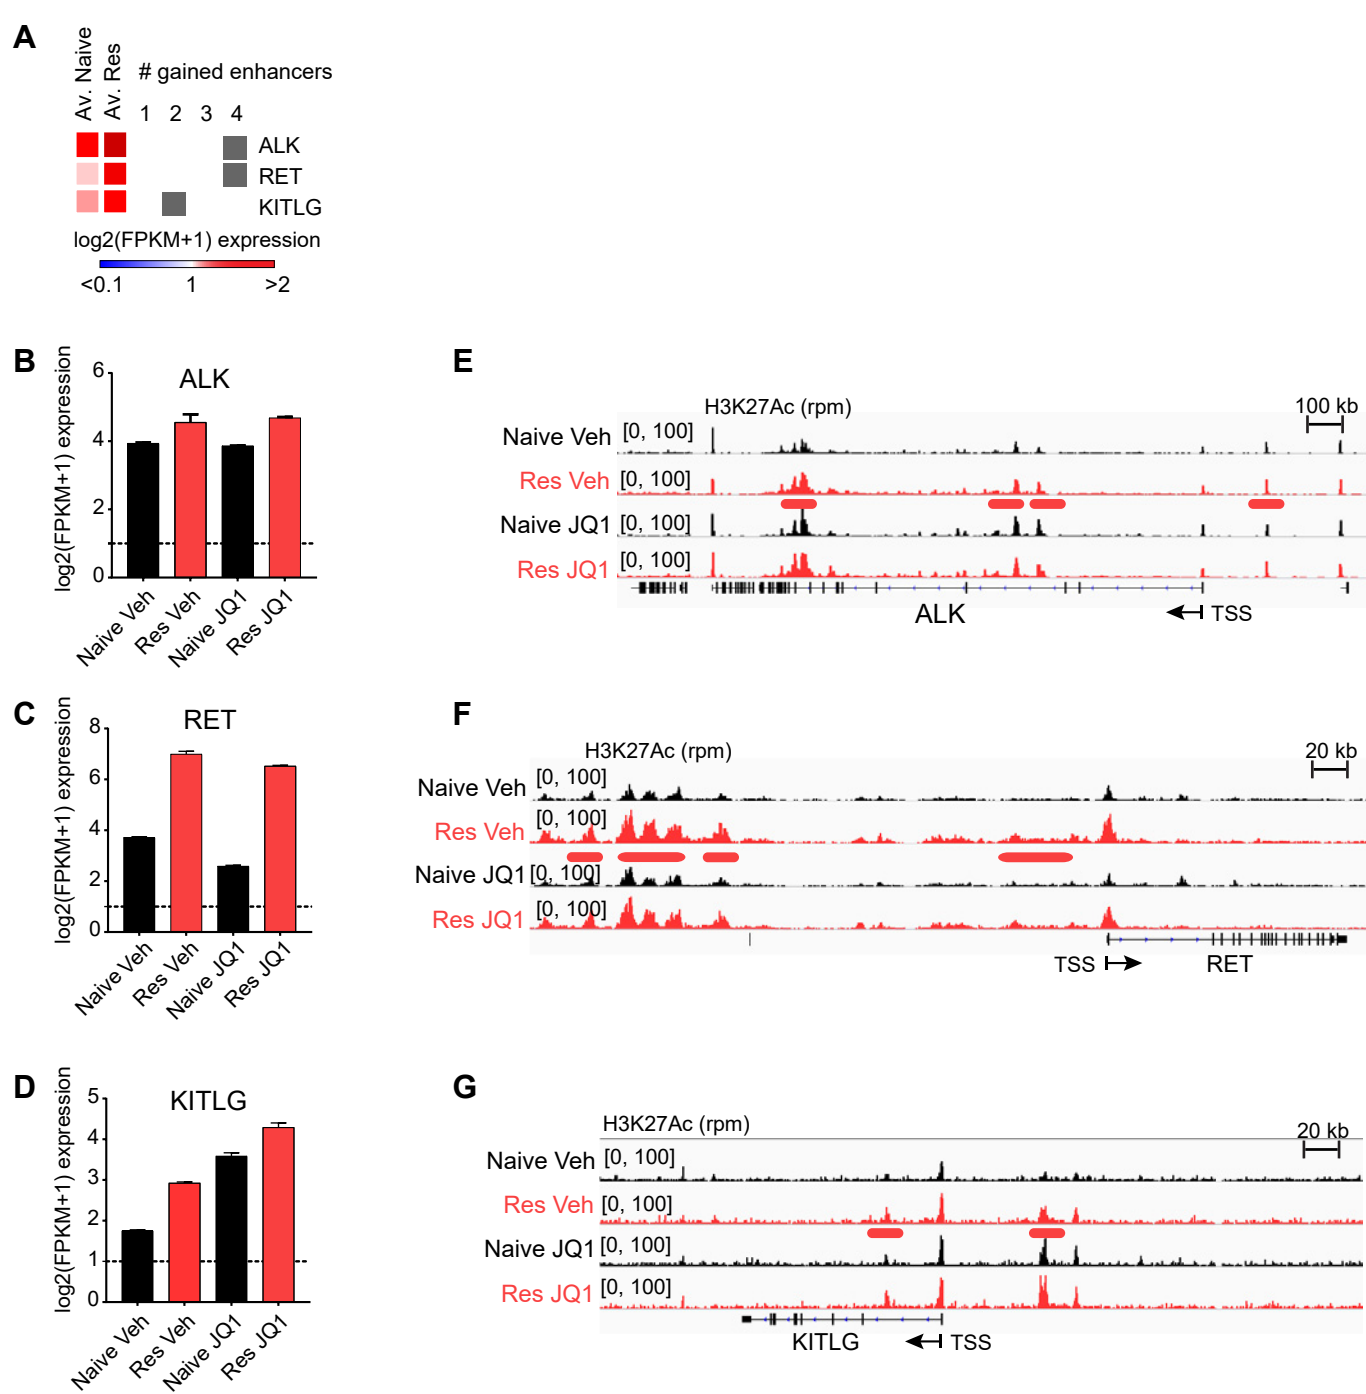

**Figure S5, Related to Figure 4. Enhancer remodeling of Kelly BET inhibitor resistant cells is associated with increased expression of growth factors and RTKs. A.** Leading edge gene analysis of growth factor and RTK gene sets enriched in Kelly BET inhibitor resistant cells. Three RTK-related genes are identified as associated with gained enhancers and have log<sub>2</sub>(FC) expression >1 in resistant vs. naive cells. Average log<sub>2</sub> FPKM expression for ALK (**B**) RET (**C**) and KITLG (**D**), error bars represent SD. H3K27Ac ChIP seq tracks for ALK (**E**) RET (**F**) and KITLG (**G**). Enhancers gained in resistance are underlined.

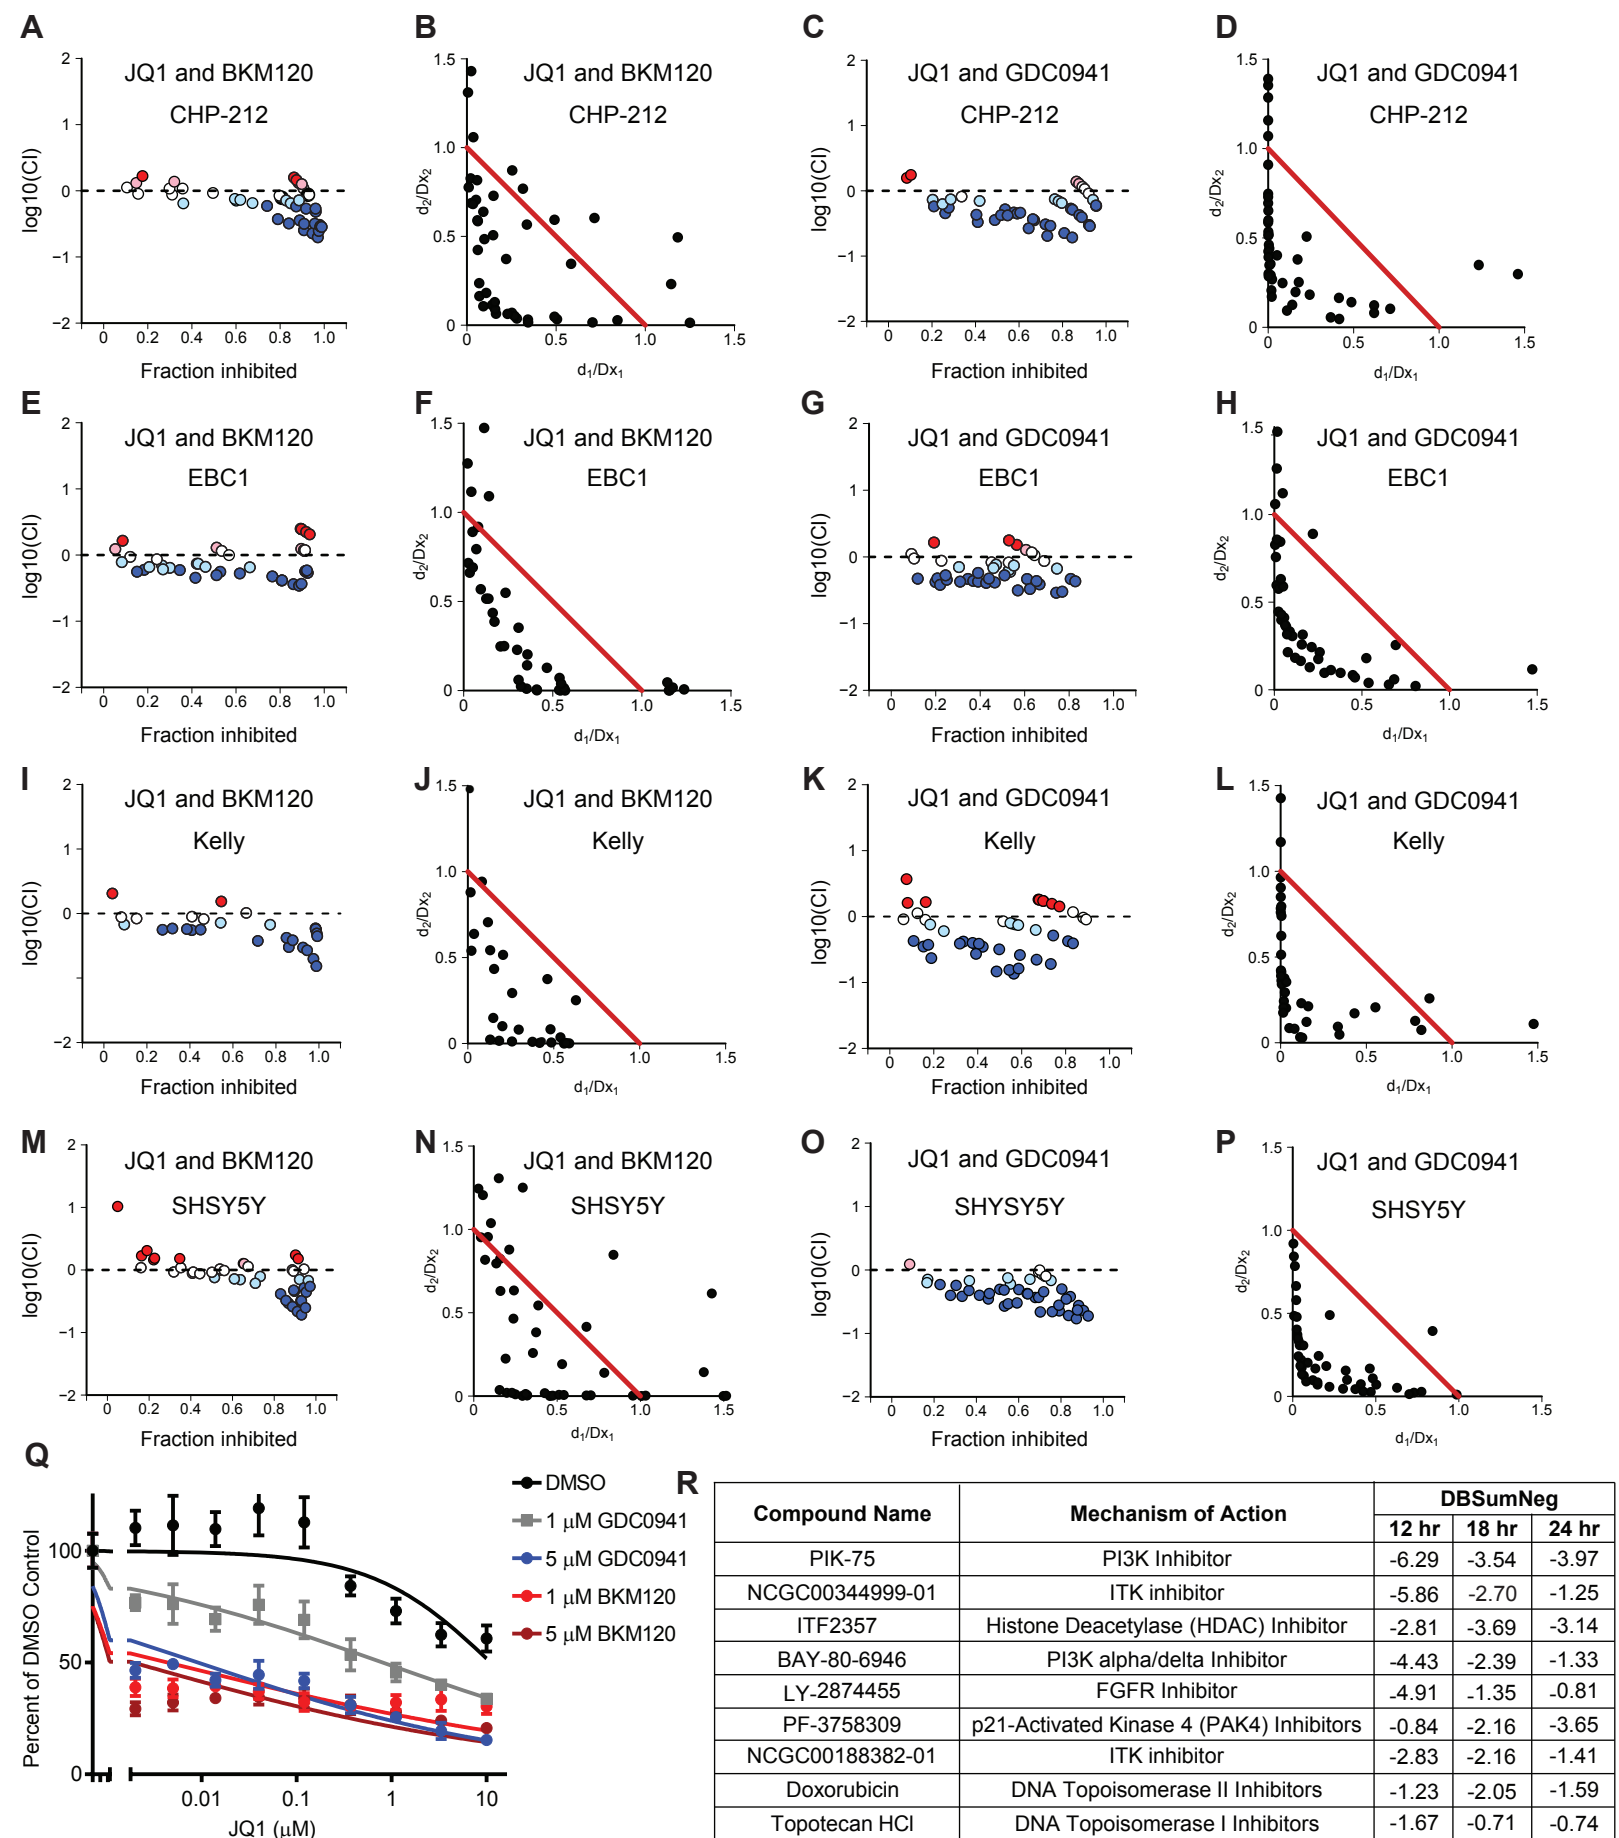

**Figure S6, Related to Figure 6: PI3K inhibitors are synergistic with BET inhibitors in a panel of neuroblastoma cell lines and resensitize innately resistant NGP cells to BET inhibition A-P.** Combination index scores and Chou-Talalay normalized isobolograms across the indicated cell lines with the indicated compounds. **Q.** Analysis of the viability effects of JQ1 treatment in NGP cells treated with the indicated concentrations of GDC0941 or BKM120. **R.** I-BET151 in combination with a library of 58 compounds in SK-N-BE(2)-C cells, at 12, 18, and 24 hrs post-treatment, measured by Caspase-Glo 3/7. Synergy was determined based on apoptotic readings using the Delta Bliss model where negative DBSumNeg scores signify synergy.

**Table S5, Related to Figure 6. JQ1 screened against the Mechanism Interrogation PlatE (MIPE) library in SK-N-BE(2)-C and LAN-1 MYCN-amplified neuroblastoma cell lines.**

| #  | Drug name               | Drug target                                            | SK-N-BE(2)-C<br>DBSumNeg<br>score | LAN-1<br>DBSumNeg<br>score | Average<br>DBSumNeg score | Selected<br>hits |
|----|-------------------------|--------------------------------------------------------|-----------------------------------|----------------------------|---------------------------|------------------|
| 1  | PF-3758309              | p21-Activated Kinase 4 (PAK4) Inhibitors               | -4.048                            | -8.237                     | -6.142                    | 1                |
| 2  | BAY-80-6946             | PI3K alpha/delta Inhibitor                             | -3.527                            | -6.731                     | -5.129                    | 1                |
| 3  | BMS-754807              | IGF-1R Inhibitor                                       | -1.750                            | -4.792                     | -3.271                    | 1                |
| 4  | MK-5108                 | Aurora A Inhibitor                                     | -2.421                            | -2.835                     | -2.628                    | 1                |
| 5  | PIK-90                  | PI3K Inhibitor                                         | -1.967                            | -3.213                     | -2.590                    | 1                |
| 6  | Nanchangmycin           | Polyether Antibiotic                                   | -2.015                            | -2.977                     | -2.496                    | 1                |
| 7  | Aurora A Inhibitor I    | Aurora A Inhibitor                                     | -2.101                            | -2.528                     | -2.314                    | 1                |
| 8  | NCGC00344999-01         | ITK inhibitor                                          | -2.084                            | -2.472                     | -2.278                    | 1                |
| 9  | Oxamflatin              | Histone Deacetylase (HDAC) Inhibitor                   | -1.954                            | -2.571                     | -2.262                    | 1                |
| 10 | GDC-0941                | PI3K Inhibitor                                         | -1.922                            | -2.535                     | -2.228                    | 1                |
| 11 | CH-5132799              | PI3Kalpha, beta, gamma Inhibitor                       | -2.518                            | -1.916                     | -2.217                    | 1                |
| 12 | BAY61-3606              | Syk Kinase inhibitor                                   | -1.785                            | -2.610                     | -2.197                    | 1                |
| 13 | GNE-493                 | PI3K Inhibitor                                         | -1.819                            | -2.435                     | -2.127                    | 1                |
| 14 | NSC319726               | Mutant p53 Activator                                   | -1.954                            | -2.293                     | -2.124                    | 1                |
| 15 | ZSTK-474                | PI3K Inhibitor                                         | -2.178                            | -1.910                     | -2.044                    | 1                |
| 16 | BYL-719                 | PI3K alpha Inhibitor                                   | -2.104                            | -1.921                     | -2.012                    | 1                |
| 17 | Rapamycin               | mTOR inhibitor                                         | -2.046                            | -1.832                     | -1.939                    | 1                |
| 18 | GNE-490                 | PI3K Inhibitor                                         | -1.923                            | -1.901                     | -1.912                    | 1                |
| 19 | Triciribine phosphate   | PKB/Akt Inhibitor                                      | -1.757                            | -1.880                     | -1.818                    | 1                |
| 20 | BKM-120                 | PI3Kalpha inhibitor                                    | -1.786                            | -1.837                     | -1.812                    | 1                |
| 21 | Ispinesib               | Kinesin-Like Spindle Protein Inhibitor                 | -1.605                            | -6.658                     | -4.132                    | 0                |
| 22 | SB-743921               | Kinesin-Like Spindle Protein Inhibitor                 | -0.530                            | -7.614                     | -4.072                    | 0                |
| 23 | ARRY-520                | Kinesin-Like Spindle Protein Inhibitor                 | -0.951                            | -6.734                     | -3.842                    | 0                |
| 24 | Cabazitaxel             | Tubulin depolymerization inhibitor                     | -0.300                            | -6.805                     | -3.552                    | 0                |
| 25 | Epothilone B            | Tubulin depolymerization inhibitor                     | -0.884                            | -6.051                     | -3.468                    | 0                |
| 26 | Danusertib              | Aurora-A/B/C Kinase Inhibitor                          | -0.650                            | -6.160                     | -3.405                    | 0                |
| 27 | PHA-793887              | CDK1,2,3,4,5 Inhibitor                                 | -1.686                            | -4.891                     | -3.288                    | 0                |
| 28 | Vincristine sulfate     | Tubulin polymerization inhibitor                       | -0.937                            | -4.860                     | -2.899                    | 0                |
| 29 | MK-3207                 | Calcitonin Gene-Related Peptides (CGRP) Antagonists    | -5.242                            | -0.275                     | -2.758                    | 0                |
| 30 | Elactocin               | Antineoplastic Antibiotics                             | -0.432                            | -5.085                     | -2.758                    | 0                |
| 31 | TAE-684                 | Anaplastic Lymphoma Kinase (ALK) Inhibitor             | -1.511                            | -3.904                     | -2.707                    | 0                |
| 32 | Colchicine              | Tubulin polymerization inhibitor                       | -0.717                            | -4.675                     | -2.696                    | 0                |
| 33 | Docetaxel               | Tubulin depolymerization inhibitor                     | -0.241                            | -4.940                     | -2.591                    | 0                |
| 34 | GSK-1070916A            | Aurora-B/C Inhibitor                                   | -0.501                            | -4.581                     | -2.541                    | 0                |
| 35 | Epothilone A            | Tubulin depolymerization inhibitor                     | -0.264                            | -4.795                     | -2.529                    | 0                |
| 36 | SNS-032                 | CDK2,7,9 Inhibitor                                     | -3.368                            | -1.668                     | -2.518                    | 0                |
| 37 | NVP-AUY922              | Heat Shock Protein 90 (hsp90) Inhibitor                | -1.726                            | -3.285                     | -2.505                    | 0                |
| 38 | Plinabulin              | Tubulin polymerization inhibitor                       | -0.425                            | -4.521                     | -2.473                    | 0                |
| 39 | Alisertib               | Aurora-A inhibitor                                     | -0.420                            | -4.518                     | -2.469                    | 0                |
| 40 | Linsitinib              | IGF-1R Inhibitors                                      | -1.469                            | -3.342                     | -2.406                    | 0                |
| 41 | GSK-2126458             | PI3Kalpha/beta/delta/gamma Inhibitor                   | -1.739                            | -3.018                     | -2.379                    | 0                |
| 42 | NCGC00161703            | NF-kB/AP-1 activation inhibitor                        | -1.405                            | -3.349                     | -2.377                    | 0                |
| 43 | PACLITAXEL              | Tubulin depolymerization inhibitor                     | -0.421                            | -4.333                     | -2.377                    | 0                |
| 44 | Lestaurtinib???         | Jak/Tyk/Flt inhibitor                                  | -0.332                            | -4.383                     | -2.357                    | 0                |
| 45 | Demecolcine             | Tubulin polymerization inhibitor                       | -0.894                            | -3.758                     | -2.326                    | 0                |
| 46 | GSK3 Inhibitor          | GSK-3 inhibitor                                        | -0.461                            | -4.035                     | -2.248                    | 0                |
| 47 | LY-2874455              | FGFR Inhibitor                                         | -0.991                            | -3.419                     | -2.205                    | 0                |
| 48 | Tozasertib              | Aurora-A/B/C Kinase Inhibitor                          | -0.733                            | -3.622                     | -2.177                    | 0                |
| 49 | Cephalomannine          | Tubulin depolymerization inhibitor                     | -0.158                            | -4.157                     | -2.158                    | 0                |
| 50 | GSK1838705A             | IGF-1R Inhibitor                                       | -0.701                            | -3.507                     | -2.104                    | 0                |
| 51 | Doxorubicin             | DNA Topoisomerase II Inhibitors                        | -0.998                            | -3.179                     | -2.089                    | 0                |
| 52 | Emetine                 | antiprotozoal agent                                    | -1.405                            | -2.759                     | -2.082                    | 0                |
| 53 | Vinflunine              | Tubulin polymerization inhibitor                       | -0.950                            | -3.202                     | -2.076                    | 0                |
| 54 | KX-01                   | Src Kinase Inhibitors                                  | -1.129                            | -3.018                     | -2.073                    | 0                |
| 55 | Panobinostat            | Histone Deacetylase (HDAC) Inhibitor                   | -0.615                            | -3.493                     | -2.054                    | 0                |
| 56 | PD 0325901              | MEK inhibitor                                          | -2.467                            | -1.631                     | -2.049                    | 0                |
| 57 | Withaferin A            | NF-kappaB Activation Inhibitor                         | -1.510                            | -2.574                     | -2.042                    | 0                |
| 58 | ADW-742                 | IGF-1R Inhibitor                                       | -1.498                            | -2.585                     | -2.042                    | 0                |
| 59 | AZD-1152-HQPA           | Aurora-A/B Inhibitor                                   | -0.943                            | -3.129                     | -2.036                    | 0                |
| 60 | Mitomycin               | DNA Alkylating Agent                                   | -0.560                            | -3.487                     | -2.023                    | 0                |
| 61 | Ombrabulin              | Tubulin polymerization inhibitor                       | -0.307                            | -3.706                     | -2.006                    | 0                |
| 62 | Apilimod                | IL-12 Production Inhibitor                             | -0.971                            | -3.037                     | -2.004                    | 0                |
| 63 | Bleomycin sulfate       | glycopeptide antibiotic                                | -0.906                            | -3.078                     | -1.992                    | 0                |
| 64 | Oprozomib               | Proteasome Inhibitor                                   | -1.710                            | -2.268                     | -1.989                    | 0                |
| 65 | WYE-125132              | mTORC1/2 inhibitor                                     | -1.540                            | -2.330                     | -1.935                    | 0                |
| 66 | GSK-461364A             | Polo-like Kinase-1 (Plk-1) Inhibitor                   | -0.519                            | -3.342                     | -1.931                    | 0                |
| 67 | ITF2357 (Givinostat)    | Histone Deacetylase (HDAC) Inhibitor                   | -1.532                            | -2.327                     | -1.929                    | 0                |
| 68 | AZ-960                  | Jak2/3 Inhibitor                                       | -0.927                            | -2.927                     | -1.927                    | 0                |
| 69 | Lexibulin hydrochloride | Tubulin depolymerization inhibitor                     | -0.277                            | -3.468                     | -1.872                    | 0                |
| 70 | Oxibendazole            | DNA Polymerase Inhibitors                              | -0.460                            | -3.256                     | -1.858                    | 0                |
| 71 | HMSL10016               | EGFR (HER1; erbB1) Inhibitor                           | -0.697                            | -3.004                     | -1.851                    | 0                |
| 72 | ABT-737                 | Bcl-xL inhibitor                                       | -0.980                            | -2.718                     | -1.849                    | 0                |
| 73 | AVN-944                 | psine 5'-Monophosphate Dehydrogenase (IMPDH) Inhibitor | -0.861                            | -2.831                     | -1.846                    | 0                |
| 74 | Belinostat              | Histone Deacetylase (HDAC) 1/2 Inhibitor               | -1.581                            | -2.094                     | -1.837                    | 0                |
| 75 | Tosedostat              | Aminopeptidase N Inhibitor                             | -2.451                            | -1.219                     | -1.835                    | 0                |
| 76 | Birinapant              | IAP Inhibitor                                          | -3.182                            | -0.488                     | -1.835                    | 0                |
| 77 | Trametinib              | Mek 1/2 inhibitor                                      | -2.173                            | -1.490                     | -1.831                    | 0                |
| 78 | SNX-2112                | Heat Shock Protein 90 (hsp90) Inhibitor                | -1.521                            | -2.112                     | -1.817                    | 0                |

| #   | Drug name                  | Drug target                                                  | SK-N-BE(2)-C<br>DBSumNeg<br>score | LAN-1<br>DBSumNeg<br>score | Average<br>DBSumNeg score | Selected<br>hits |
|-----|----------------------------|--------------------------------------------------------------|-----------------------------------|----------------------------|---------------------------|------------------|
| 79  | SCH-79797                  | PAR1 Antagonist                                              | -0.683                            | -2.950                     | -1.817                    | 0                |
| 80  | AMG-900                    | Aurora-A/B/C Kinase Inhibitor                                | -0.379                            | -3.244                     | -1.811                    | 0                |
| 81  | Indibulin                  | Tubulin polymerization inhibitor                             | -0.535                            | -3.082                     | -1.808                    | 0                |
| 82  | Axitinib                   | VEGFR-1/2/3 Inhibitor                                        | -0.583                            | -3.028                     | -1.806                    | 0                |
| 83  | GDC-0980                   | mTOR inhibitor                                               | -1.278                            | -2.323                     | -1.801                    | 0                |
| 84  | PIK-75                     | PI3K Inhibitor                                               | -1.031                            | -2.569                     | -1.800                    | 0                |
| 85  | GSK-923295                 | Centromere Associated Protein (CENP) Inhibitors              | -0.683                            | -2.913                     | -1.798                    | 0                |
| 86  | Podofilox                  | Antimitotic Agent; IGF-1R Inhibitors                         | -0.257                            | -3.331                     | -1.794                    | 0                |
| 87  | Purflacamine               | Calcium Dependent Protein Kinase (CDPK) 1 Inhibitor          | -1.353                            | -2.229                     | -1.791                    | 0                |
| 88  | Parbendazole               | Tubulin depolymerization inhibitor                           | -0.894                            | -2.681                     | -1.788                    | 0                |
| 89  | Quisnostat hydrochlorid    | HDAC1 Inhibitor                                              | -0.879                            | -2.694                     | -1.787                    | 0                |
| 90  | Rotenone                   | NADH-Ubiquinone Oxidoreductase (Complex I) Inhibitor         | -1.492                            | -2.039                     | -1.766                    | 0                |
| 91  | BI-2536                    | Polo-like Kinase-1 (Plk-1) Inhibitor                         | -0.760                            | -2.748                     | -1.754                    | 0                |
| 92  | Remethylepipodophyllotoxin | Antimitotic Agent                                            | -0.546                            | -2.956                     | -1.751                    | 0                |
| 93  | Antimycin A                | Antifungal Agent                                             | -1.375                            | -2.127                     | -1.751                    | 0                |
| 94  | Combretastatin A-4         | Tubulin polymerization inhibitor                             | -0.733                            | -2.764                     | -1.748                    | 0                |
| 95  | Flubendazole               | antiparasitic agent                                          | -0.900                            | -2.596                     | -1.748                    | 0                |
| 96  | Daunorubicin               | Antineoplastic Antibiotics                                   | -0.894                            | -2.594                     | -1.744                    | 0                |
| 97  | Torin-2                    | mTORC1 Inhibitor                                             | -1.105                            | -2.378                     | -1.741                    | 0                |
| 98  | 2-Methoxyestradiol         | Hypoxia Inducible Factor 1-alpha Inhibitor                   | -0.796                            | -2.683                     | -1.740                    | 0                |
| 99  | PD-318088                  | Mek 1/2 inhibitor                                            | -1.762                            | -1.713                     | -1.738                    | 0                |
| 100 | AT-13387AU                 | Heat Shock Protein 90 (hsp90) Inhibitor                      | -0.590                            | -2.884                     | -1.737                    | 0                |
| 101 | NCGC00344990-01            | ITK inhibitor                                                | -0.474                            | -2.953                     | -1.714                    | 0                |
| 102 | Salinomycin                | Anticoccidial/Antibacterial                                  | -0.703                            | -2.709                     | -1.706                    | 0                |
| 103 | MK-1775                    | Wee1 Kinase Inhibitor                                        | -0.914                            | -2.442                     | -1.678                    | 0                |
| 104 | NVP-TAE226                 | Focal Adhesion Kinase (FAK) Inhibitor                        | -0.948                            | -2.400                     | -1.674                    | 0                |
| 105 | Tivantinib                 | HGFR (MET; c-Met) Inhibitor                                  | -1.563                            | -1.785                     | -1.674                    | 0                |
| 106 | Pirarubicin                | DNA Topoisomerase II Inhibitors                              | -0.880                            | -2.444                     | -1.662                    | 0                |
| 107 | Triptolide                 | Inhibition of RNA polymerase II?mediated transcription       | -0.496                            | -2.821                     | -1.659                    | 0                |
| 108 | PF-05212384                | mTOR inhibitor                                               | -0.659                            | -2.654                     | -1.657                    | 0                |
| 109 | PI-103                     | PI3Kalpha, beta, gamma Inhibitor                             | -1.991                            | -1.307                     | -1.649                    | 0                |
| 110 | Dorsomorphin               | TGF-beta1 (ALK5) inhibitor                                   | -1.785                            | -1.507                     | -1.646                    | 0                |
| 111 | NCGC00188382-01            | ITK inhibitor                                                | -1.487                            | -1.803                     | -1.645                    | 0                |
| 112 | Ansamitocin P3             | Tubulin polymerization inhibitor                             | -0.152                            | -3.125                     | -1.639                    | 0                |
| 113 | SNS-314                    | Aurora-A/B/C Kinase Inhibitor                                | -0.319                            | -2.956                     | -1.637                    | 0                |
| 114 | A-66                       | PI3Kalpha inhibitor                                          | -1.536                            | -1.734                     | -1.635                    | 0                |
| 115 | HMSL10019                  | Lck Kinase Inhibitors                                        | -1.941                            | -1.315                     | -1.628                    | 0                |
| 116 | BMS-265246                 | CDK1/2 Inhibitor                                             | -1.561                            | -1.680                     | -1.620                    | 0                |
| 117 | Actinomycin D              | DNA-Directed RNA Polymerase Inhibitor                        | -1.245                            | -1.986                     | -1.616                    | 0                |
| 118 | ASP-3026                   | Anaplastic Lymphoma Kinase (ALK) Inhibitor                   | -1.238                            | -1.952                     | -1.595                    | 0                |
| 119 | TAK-733                    | MEK inhibitor                                                | -2.140                            | -1.042                     | -1.591                    | 0                |
| 120 | XRP-44X                    | Tubulin polymerization inhibitor                             | -0.519                            | -2.653                     | -1.586                    | 0                |
| 121 | HMSL10015                  | Bcr-Abl inhibitor                                            | -0.873                            | -2.297                     | -1.585                    | 0                |
| 122 | BMS-536924                 | IGF-1R Inhibitor                                             | -0.957                            | -2.194                     | -1.576                    | 0                |
| 123 | MLN-4924                   | NEDD8-Activating Enzyme (NAE) Inhibitors                     | -0.652                            | -2.495                     | -1.574                    | 0                |
| 124 | Flavopiridol               | CDK1/2/4/6/7/9 Inhibitor                                     | -1.480                            | -1.666                     | -1.573                    | 0                |
| 125 | CHS-828                    | IKK Inhibitor                                                | -0.366                            | -2.778                     | -1.572                    | 0                |
| 126 | CUDC-101                   | EGFR (HER1; erbB1) inhibitor                                 | -0.904                            | -2.234                     | -1.569                    | 0                |
| 127 | PP-121                     | PDGFR Inhibitor                                              | -1.579                            | -1.556                     | -1.568                    | 0                |
| 128 | PD-0332991                 | CDK4, 6 Inhibitor                                            | -1.971                            | -1.164                     | -1.568                    | 0                |
| 129 | Ponatinib                  | FGFR Inhibitor                                               | -1.031                            | -2.085                     | -1.558                    | 0                |
| 130 | SNX-5422                   | Heat Shock Protein 90 (hsp90) Inhibitor                      | -1.560                            | -1.549                     | -1.554                    | 0                |
| 131 | Serdemetan                 | MDM2 (hdm2) Inhibitor                                        | -0.734                            | -2.373                     | -1.554                    | 0                |
| 132 | SB1518                     | Jak2 inhibitor                                               | -2.324                            | -0.767                     | -1.545                    | 0                |
| 133 | Mitoxantrone               | DNA Topoisomerase II Inhibitors                              | -0.558                            | -2.516                     | -1.537                    | 0                |
| 134 | AZD-8055                   | mTORC1/2 Inhibitor                                           | -1.419                            | -1.643                     | -1.531                    | 0                |
| 135 | Camptothecin               | DNA Topoisomerase I Inhibitors                               | -0.618                            | -2.441                     | -1.530                    | 0                |
| 136 | Diclazuril                 | antiprotozoal agent                                          | -2.607                            | -0.449                     | -1.528                    | 0                |
| 137 | Carfilzomib                | Proteasome Inhibitor                                         | -0.554                            | -2.490                     | -1.522                    | 0                |
| 138 | Dacinostat                 | HDAC Inhibitor                                               | -1.322                            | -1.718                     | -1.520                    | 0                |
| 139 | Nocodazole                 | Tubulin depolymerization inhibitor                           | -0.920                            | -2.119                     | -1.519                    | 0                |
| 140 | 10-hydroxycamptothecin     | DNA Topoisomerase I Inhibitors                               | -0.469                            | -2.562                     | -1.515                    | 0                |
| 141 | Rebeccamycin               | DNA Topoisomerase I Inhibitors                               | -0.324                            | -2.658                     | -1.491                    | 0                |
| 142 | JZL-184                    | Monoacylglycerol lipase (MAGL) inhibitor                     | -1.727                            | -1.251                     | -1.489                    | 0                |
| 143 | Crenolanib                 | PDGFR beta inhibitor                                         | -1.608                            | -1.342                     | -1.475                    | 0                |
| 144 | CAY10581                   | Indoleamine 2,3-dioxygenase (IDO) inhibitor                  | -0.986                            | -1.940                     | -1.463                    | 0                |
| 145 | CAY10626                   | PI3Kalpha inhibitor                                          | -0.210                            | -2.706                     | -1.458                    | 0                |
| 146 | Emcitabine hydrochloride   | ribonucleotide reductase inhibitor                           | -0.415                            | -2.474                     | -1.445                    | 0                |
| 147 | TAK-901                    | Aurora-A/B Inhibitor                                         | -0.490                            | -2.395                     | -1.443                    | 0                |
| 148 | PHA-690509                 | CDK2/Cyclin A Inhibitor                                      | -1.294                            | -1.589                     | -1.442                    | 0                |
| 149 | SB612111                   | Opioid receptor antagonist                                   | -1.216                            | -1.666                     | -1.441                    | 0                |
| 150 | Oridonin                   | Nuclear Factor, Erythroid Derived 2, Like 2 (Nrf2) Activator | -1.439                            | -1.442                     | -1.441                    | 0                |
| 151 | CX-6258                    | Pim 1/2/3 Kinase Inhibitor                                   | -1.208                            | -1.667                     | -1.437                    | 0                |
| 152 | Monensin sodium salt       | Polyether Antibiotic                                         | -0.880                            | -1.991                     | -1.435                    | 0                |
| 153 | Cucurbitacin I             | Jak2 inhibitor                                               | -0.872                            | -1.994                     | -1.433                    | 0                |
| 154 | Nitazoxanide               | antiprotozoal agent                                          | -2.479                            | -0.385                     | -1.432                    | 0                |
| 155 | TG-46                      | Jak2 inhibitor                                               | -0.730                            | -2.129                     | -1.430                    | 0                |
| 156 | Tricirbine                 | PKB/Akt Inhibitor                                            | -1.606                            | -1.247                     | -1.426                    | 0                |
| 157 | NVP-AEW541                 | IGF-1R Inhibitor                                             | -0.962                            | -1.887                     | -1.424                    | 0                |
| 158 | Dacomitinib                | EGFR (HER1; erbB1) inhibitor                                 | -0.601                            | -2.236                     | -1.418                    | 0                |
| 159 | NVP-BGT226                 | PI3K Inhibitor                                               | -1.285                            | -1.537                     | -1.411                    | 0                |
| 160 | TAK-875                    | Insulin Secretagogues                                        | -0.792                            | -2.023                     | -1.407                    | 0                |



| #   | Drug name                | Drug target                                     | SK-N-BE(2)-C<br>DBSumNeg<br>score | LAN-1<br>DBSumNeg<br>score | Average<br>DBSumNeg score | Selected<br>hits |
|-----|--------------------------|-------------------------------------------------|-----------------------------------|----------------------------|---------------------------|------------------|
| 161 | PD-173955                | cSRC inhibitor                                  | -0.137                            | -2.671                     | -1.404                    | 0                |
| 162 | AZD-2014                 | mTORC1/2 inhibitor                              | -0.690                            | -2.109                     | -1.399                    | 0                |
| 163 | Vinorelbine tartrate     | Tubulin polymerization inhibitor                | 0.000                             | -2.790                     | -1.395                    | 0                |
| 164 | JK 184                   | Alcohol dehydrogenase 7 inhibitor               | -0.815                            | -1.971                     | -1.393                    | 0                |
| 165 | D-159687                 | Phosphodiesterase III D (PDE4D) inhibitor       | -1.081                            | -1.705                     | -1.393                    | 0                |
| 166 | RGB-286147               | CDK1/2/3/7/9 inhibitor                          | -1.771                            | -0.997                     | -1.384                    | 0                |
| 167 | SB-415286                | GSK-3 inhibitor                                 | -2.097                            | -0.666                     | -1.382                    | 0                |
| 168 | GBR-12935                | Dopamine Reuptake Inhibitor                     | -0.970                            | -1.789                     | -1.379                    | 0                |
| 169 | Mebendazole              | Tubulin depolymerization inhibitor              | -1.092                            | -1.657                     | -1.375                    | 0                |
| 170 | Risedronate sodium       | Farnesyl Pyrophosphate Synthase Inhibitors      | -1.509                            | -1.230                     | -1.369                    | 0                |
| 171 | CCT-137690               | Aurora-A/B/C Kinase Inhibitor                   | -0.080                            | -2.656                     | -1.368                    | 0                |
| 172 | Aclarubicin              | DNA Topoisomerase II Inhibitors                 | -0.776                            | -1.957                     | -1.366                    | 0                |
| 173 | Foretinib                | VEGFR-2 Inhibitor                               | -0.952                            | -1.777                     | -1.365                    | 0                |
| 174 | CCT-241533               | Checkpoint Kinase 2 (Chk2) Inhibitors           | -0.530                            | -2.187                     | -1.359                    | 0                |
| 175 | MLN-8054                 | Aurora-A Inhibitor                              | -0.400                            | -2.303                     | -1.351                    | 0                |
| 176 | KU 0060648               | DNA-Dependent Protein Kinase (DNA-PK) Inhibitor | -0.742                            | -1.959                     | -1.350                    | 0                |
| 177 | vespimycin hydrochloride | Heat Shock Protein 90 (hsp90) Inhibitor         | -1.005                            | -1.669                     | -1.337                    | 0                |
| 178 | LLL-12                   | STAT-3 Inhibitor                                | -1.070                            | -1.602                     | -1.336                    | 0                |
| 179 | Omecamtiv mecarbil       | Cardiac Myosin Activators                       | -1.089                            | -1.565                     | -1.327                    | 0                |
| 180 | SCH-900776               | Chk1 Inhibitor                                  | -0.965                            | -1.689                     | -1.327                    | 0                |
| 181 | Voriconazole             | Lanosterol 14alpha-demethylase Inhibitors       | -1.277                            | -1.342                     | -1.309                    | 0                |
| 182 | CNF-2024                 | Heat Shock Protein 90 (hsp90) Inhibitor         | -0.911                            | -1.696                     | -1.303                    | 0                |
| 183 | PF-04691502              | PI3K Inhibitor                                  | -0.861                            | -1.737                     | -1.299                    | 0                |
| 184 | Mubritinib               | HER2 (erbB2) Inhibitor                          | -2.000                            | -0.567                     | -1.284                    | 0                |
| 185 | G?-6976                  | PKC inhibitor                                   | -0.141                            | -2.426                     | -1.283                    | 0                |
| 186 | GSK-615                  | PI3Kalpha inhibitor                             | -0.798                            | -1.768                     | -1.283                    | 0                |
| 187 | GW 843682X               | Polo-like Kinase-1 (Plk-1) Inhibitor            | -0.472                            | -2.092                     | -1.282                    | 0                |
| 188 | Lonafarnib               | Farnesyltransferase Inhibitor                   | -0.353                            | -2.199                     | -1.276                    | 0                |
| 189 | Temsirolimus             | mTOR inhibitor                                  | -1.328                            | -1.221                     | -1.275                    | 0                |
| 190 | PH-797804                | p38 MAPK Inhibitor                              | -1.448                            | -1.099                     | -1.273                    | 0                |
| 191 | CUDC-907                 | PI3K Inhibitor                                  | -1.030                            | -1.516                     | -1.273                    | 0                |
| 192 | Picropodophyllin         | Antimitotic Agent; IGF-1R Inhibitors            | -0.405                            | -2.133                     | -1.269                    | 0                |
| 193 | Adapalene                | topical retinoid                                | -0.288                            | -2.248                     | -1.268                    | 0                |
| 194 | Suramin sodium           | Fibroblast Growth Factor (FGF) Inhibitors       | -1.424                            | -1.099                     | -1.262                    | 0                |
| 195 | Ganetespib               | Heat Shock Protein 90 (hsp90) Inhibitor         | -0.532                            | -1.990                     | -1.261                    | 0                |
| 196 | AMG-47a                  | Lck Kinase Inhibitors                           | -0.663                            | -1.858                     | -1.261                    | 0                |
| 197 | AZD-7762                 | Chk1/2 Inhibitor                                | -0.769                            | -1.751                     | -1.260                    | 0                |
| 198 | ENMD-981693              | Aurora-A Inhibitor                              | -0.672                            | -1.847                     | -1.260                    | 0                |
| 199 | NVP231                   | Ceramide kinase inhibitor                       | -1.021                            | -1.474                     | -1.247                    | 0                |
| 200 | PHA-680632               | Aurora-A/B/c Inhibitor                          | -0.594                            | -1.895                     | -1.244                    | 0                |

Twenty synergistic drug hits were identified (DBSumNeg values  $\leq -1.75$  for both cell lines), based on the significance cutoffs  $\geq 2.5$  for the absolute z-scores computed separately for the DBSumNeg values on each cell line. 10 out of 54 PI3K inhibitors scored as hits, odds ratios = 53.5, p value =  $2.21 \times 10^{-12}$ , based on the two tailed Fisher exact test. Only the top 200 compounds are shown.
